# Supplementary material for: Traces of Late Bronze and Early Iron Age Mongolian Horse Mitochondrial Lineages in Modern Populations
Source: MDPI journal article supplement (doi:10.3390/genes12030412), 2021-03-12

# Read length distribution plot for sample Er1

## Single-end read length distribution

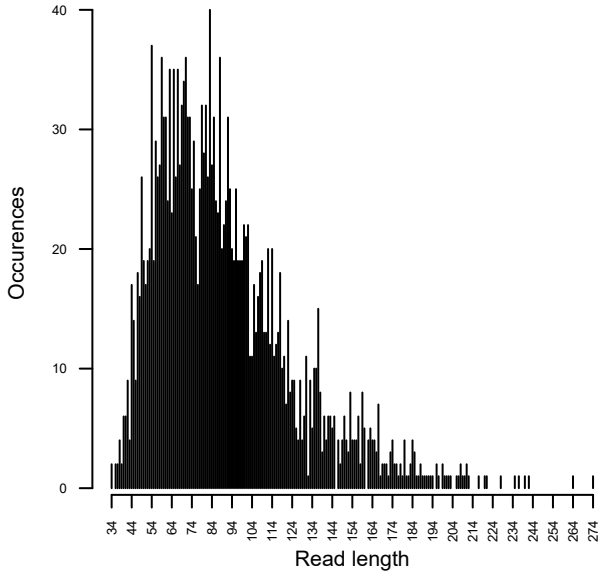

## Single-end read length per strand

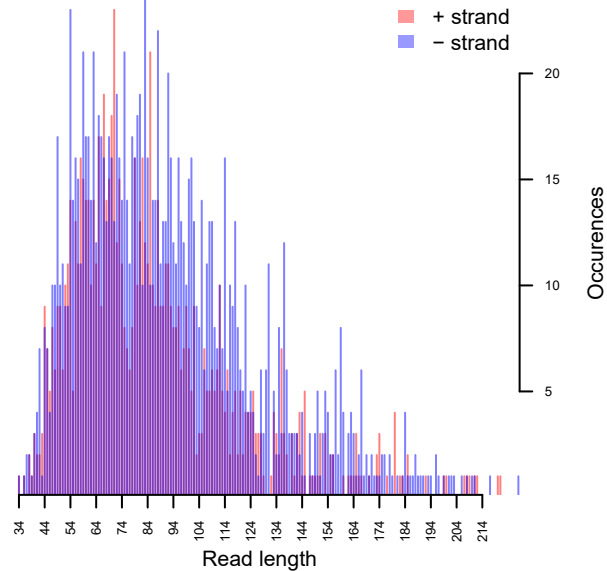

## Empirical cumulative frequency of C->T and G->A misincorporations, normalized by the first 70 positions

### C>T

### G>A

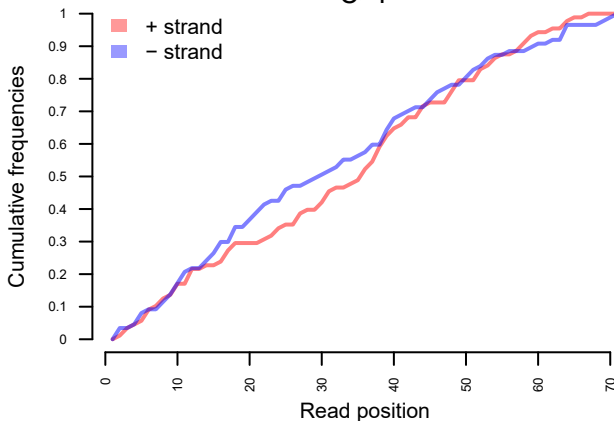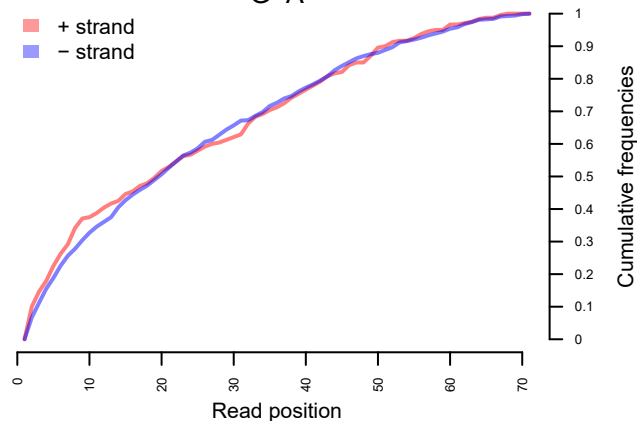

# Read length distribution plot for sample Gan1

Single-end read length distribution

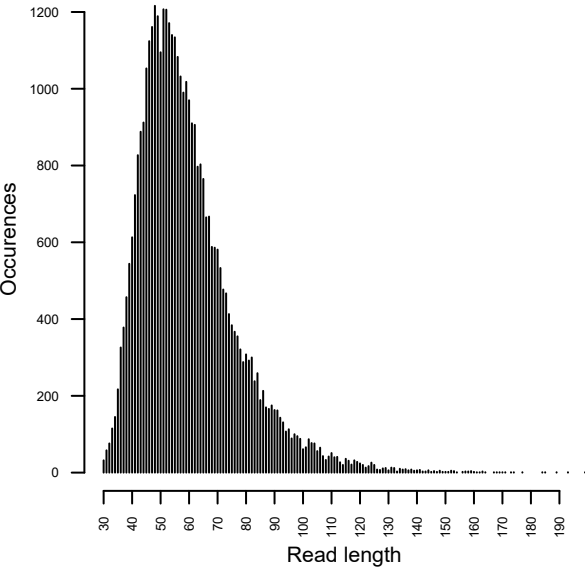

Single-end read length per strand

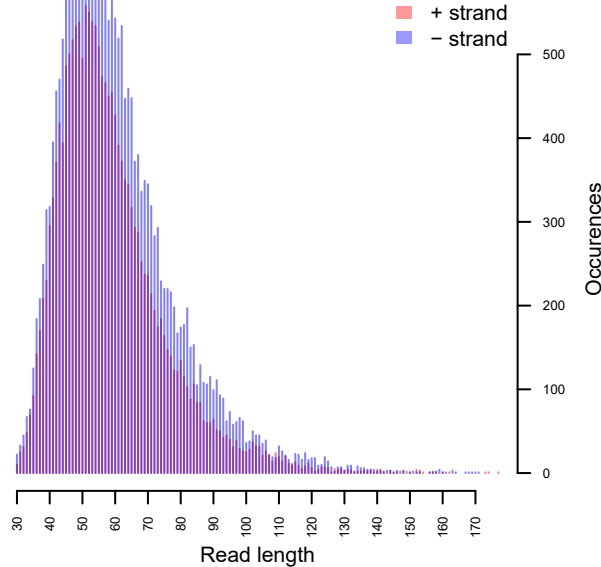

Empirical cumulative frequency of C->T and G->A misincorporations, normalized by the first 70 positions

C>T

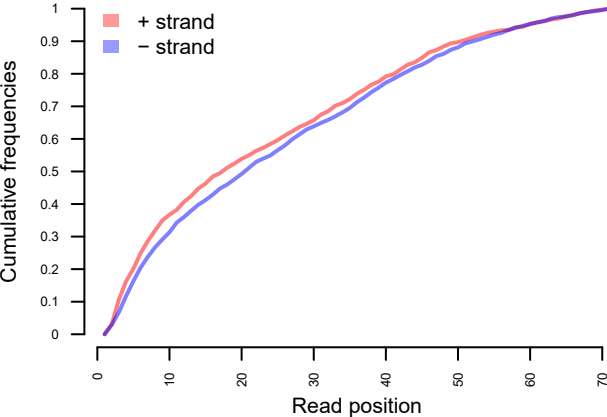

G>A

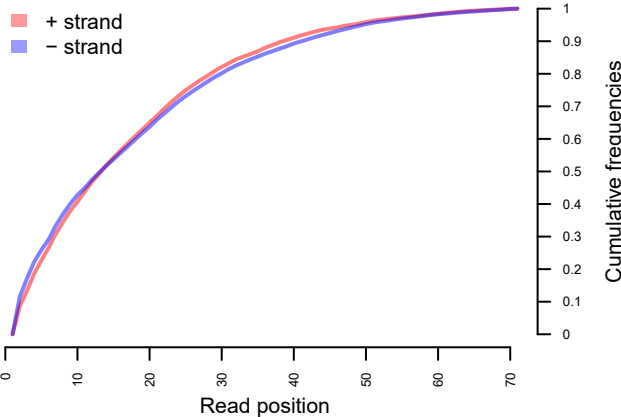

# Read length distribution plot for sample Gan3

## Single-end read length distribution

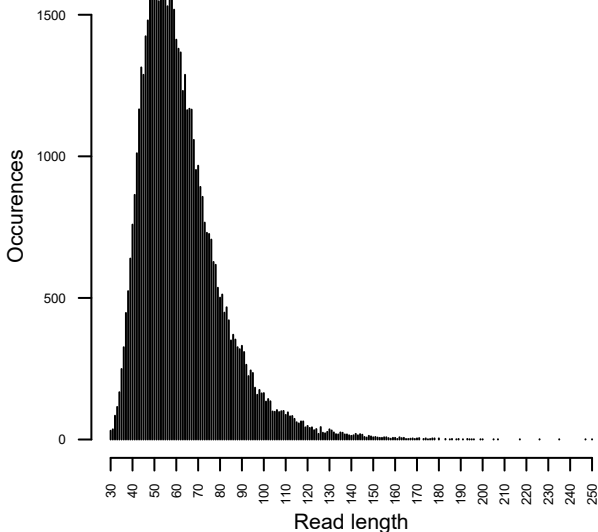

## Single-end read length per strand

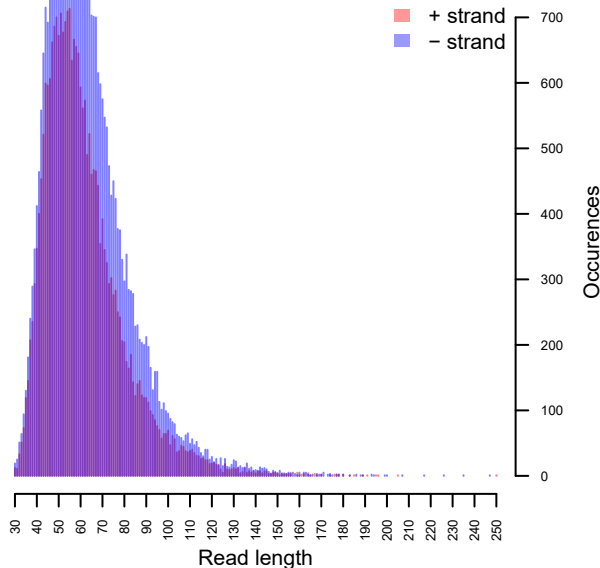

## Empirical cumulative frequency of C->T and G->A misincorporations, normalized by the first 70 positions

C>T

G>A

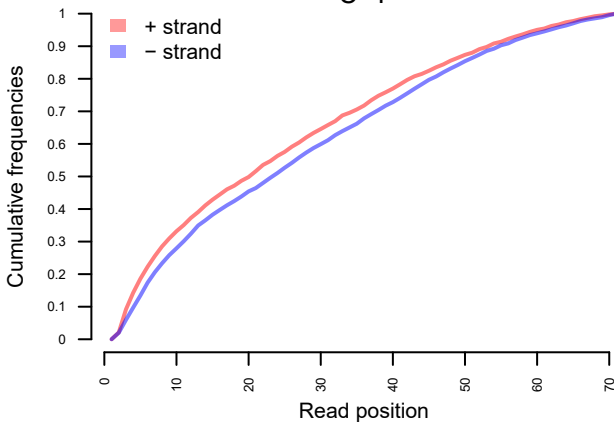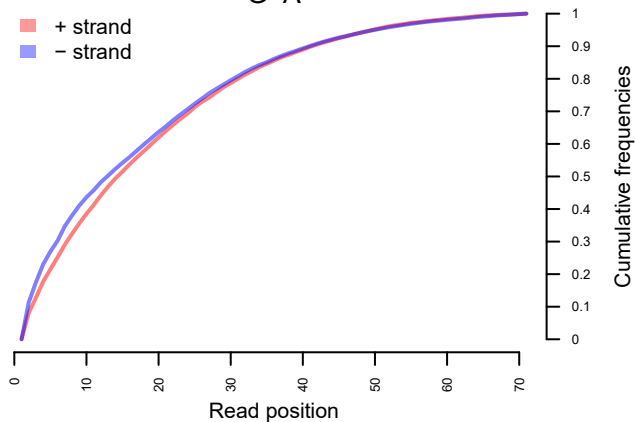

# Read length distribution plot for sample Gan11

## Single-end read length distribution

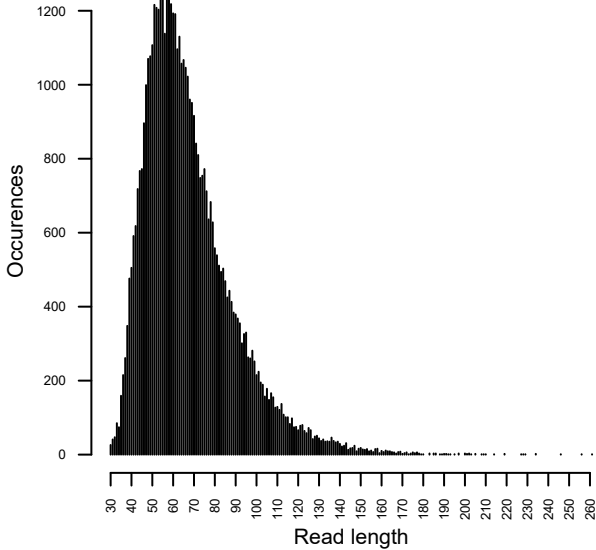

## Single-end read length per strand

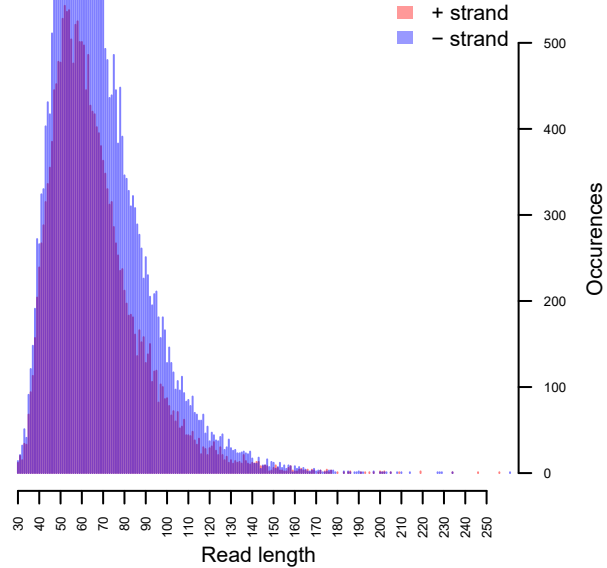

## Empirical cumulative frequency of C->T and G->A misincorporations, normalized by the first 70 positions

C>T

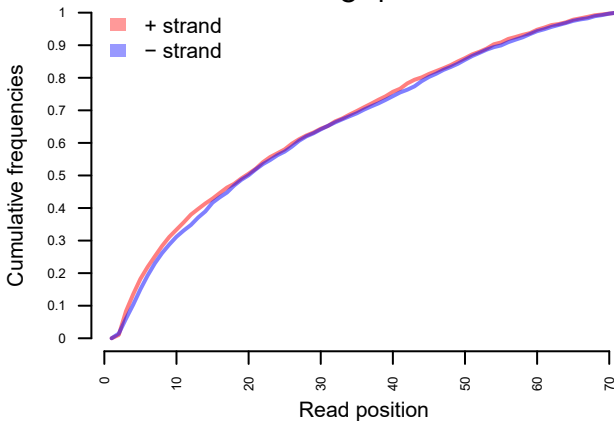

G>A

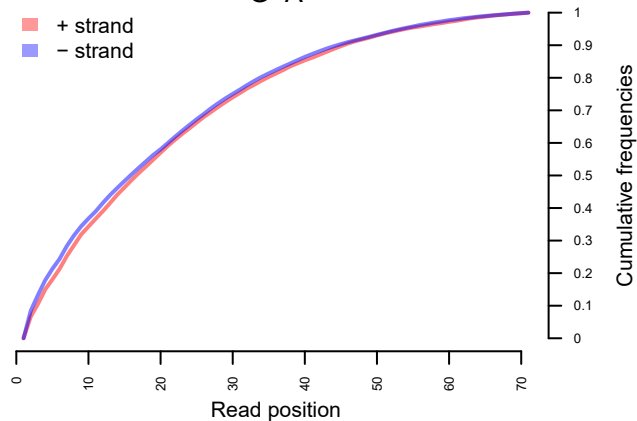

# Read length distribution plot for sample Gan14

## Single-end read length distribution

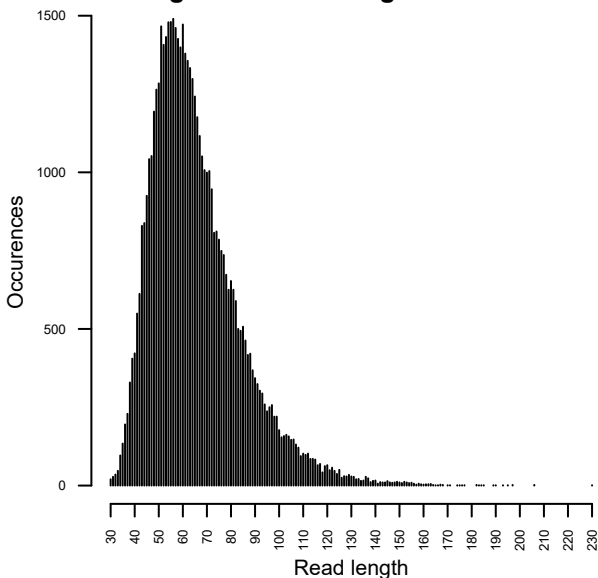

## Single-end read length per strand

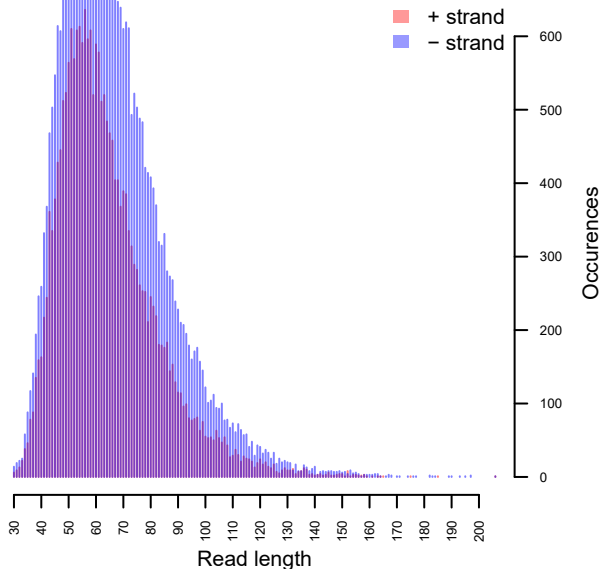

## Empirical cumulative frequency of C->T and G->A misincorporations, normalized by the first 70 positions

C>T

G>A

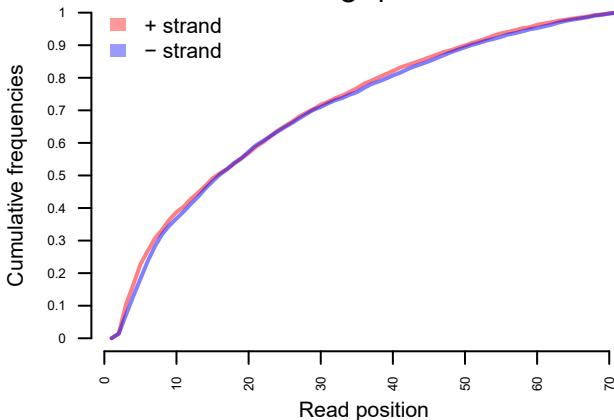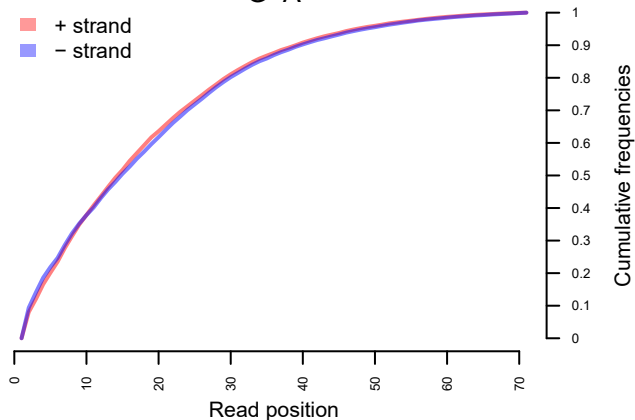

# Read length distribution plot for sample Gan18

## Single-end read length distribution

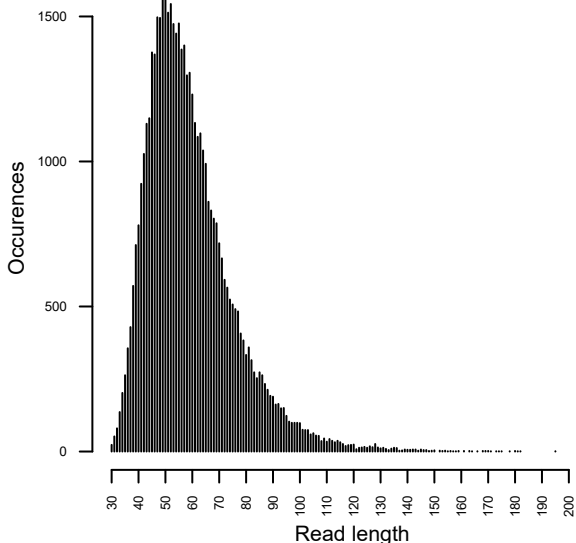

## Single-end read length per strand

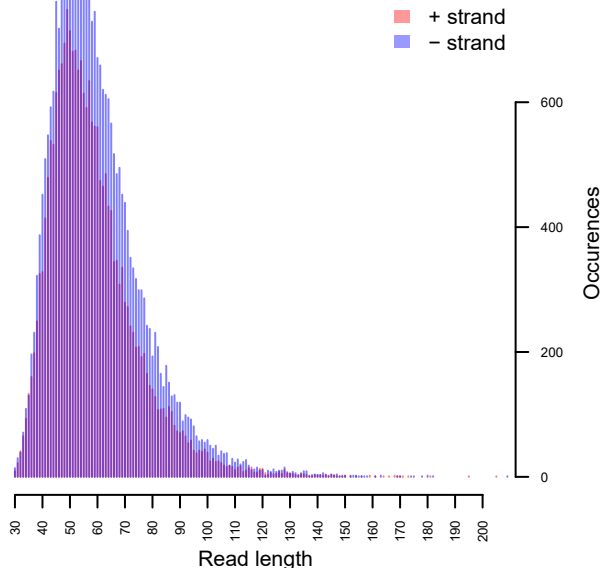

## Empirical cumulative frequency of C->T and G->A misincorporations, normalized by the first 70 positions

C>T

G>A

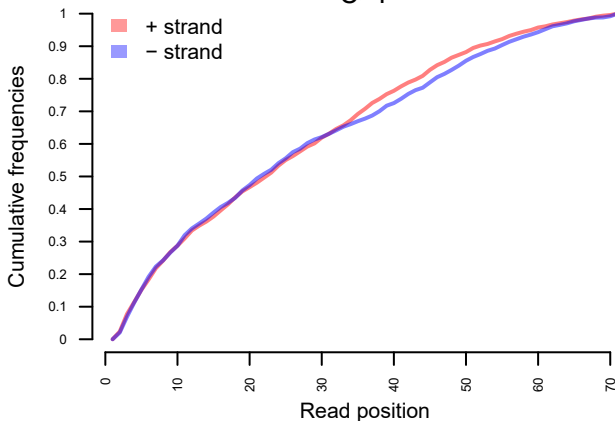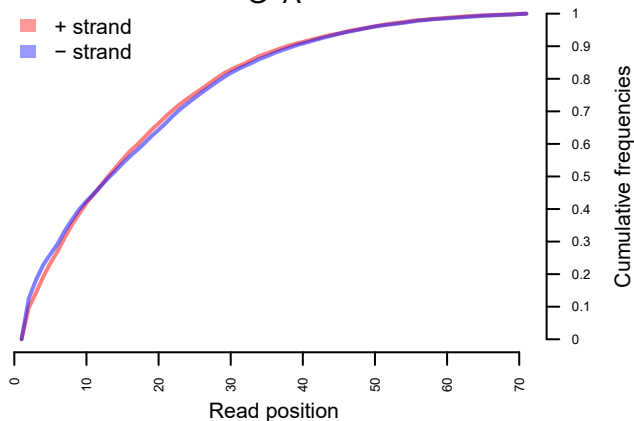

Supplement: s1 [file s1]
