# Supplementary material for: Traces of Late Bronze and Early Iron Age Mongolian Horse Mitochondrial Lineages in Modern Populations
Source: MDPI journal article supplement (doi:10.3390/genes12030412), 2021-03-12

# Nucleotide mis-incorporation plot for sample Er1

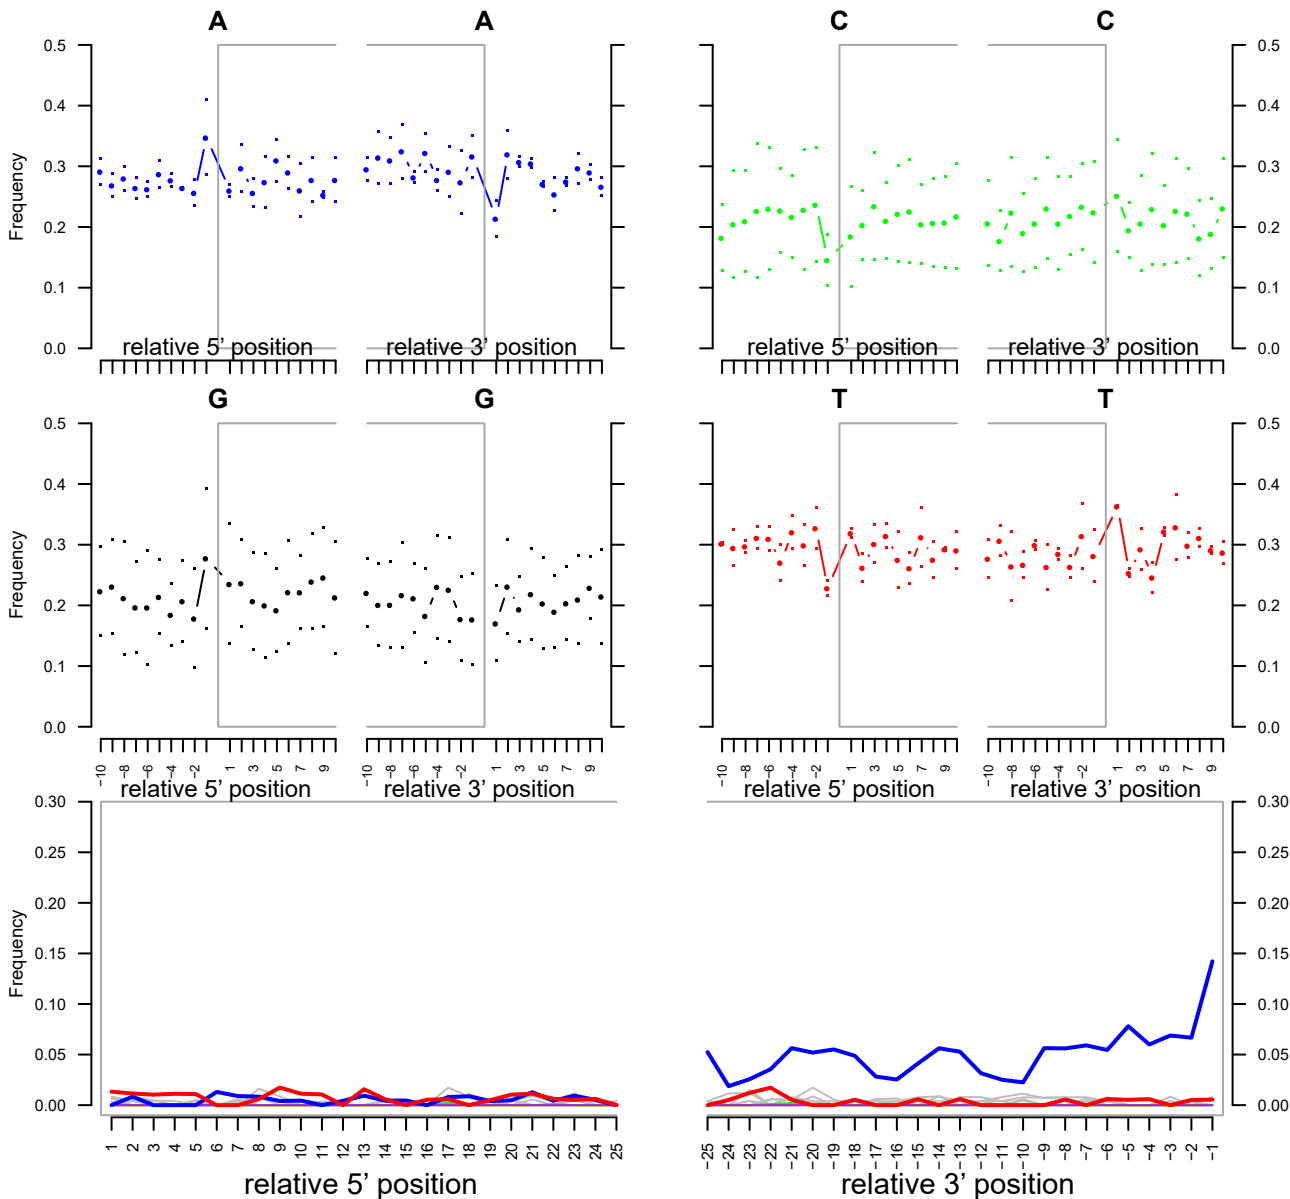

# Nucleotide mis-incorporation plot for sample Gan1

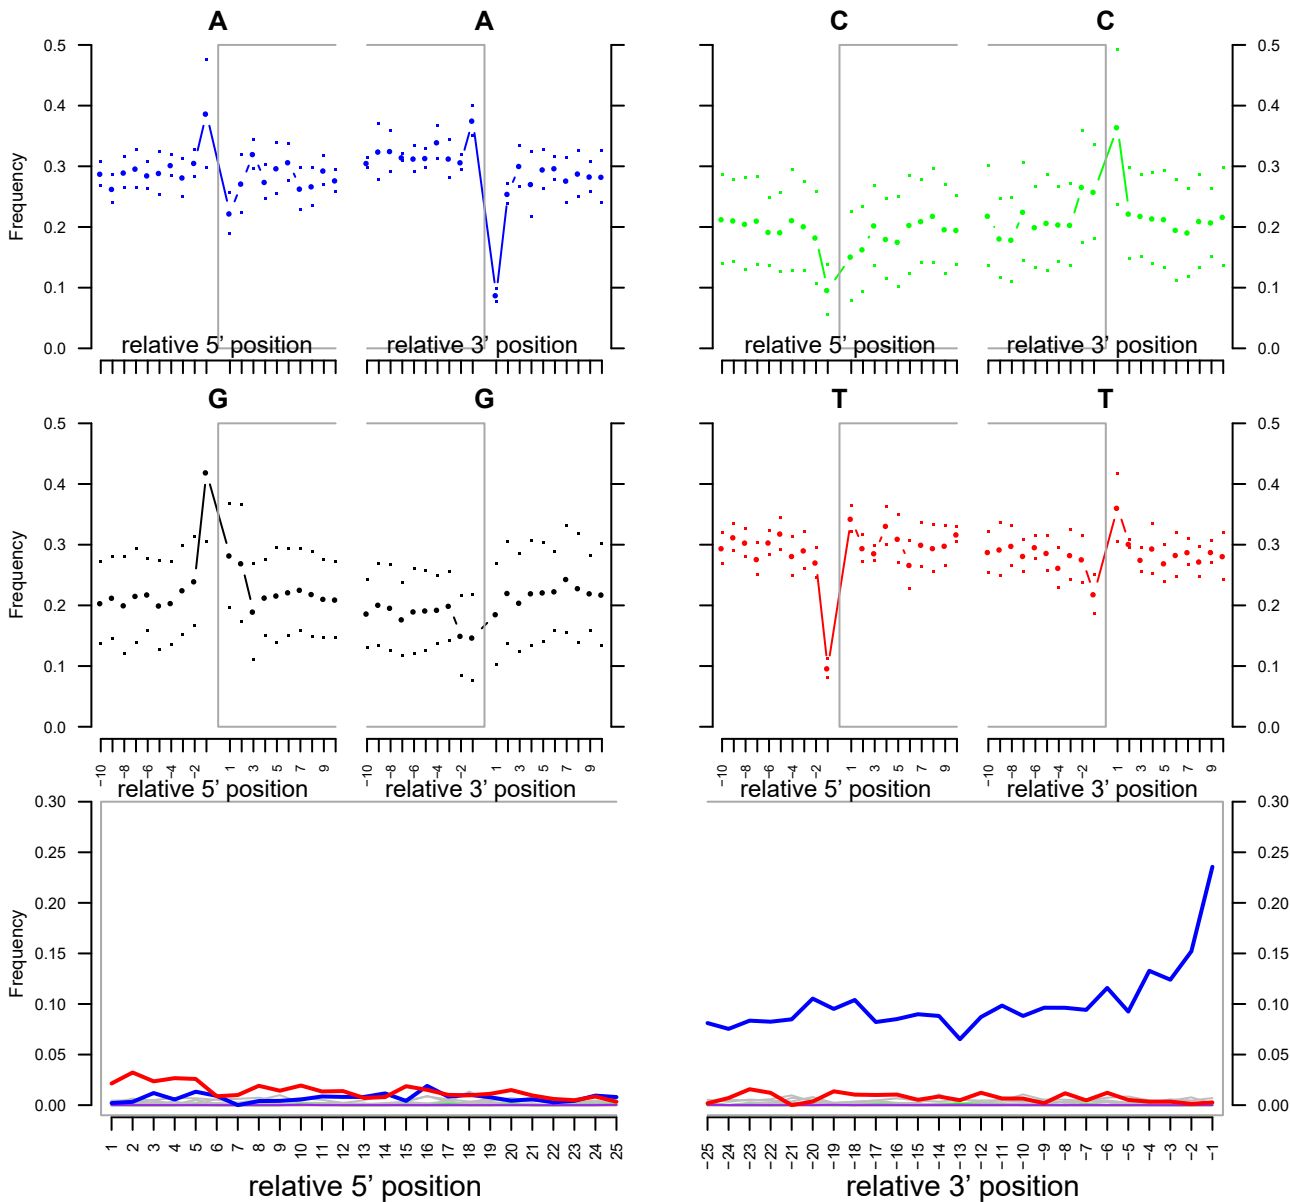

# Nucleotide mis-incorporation plot for sample Gan3

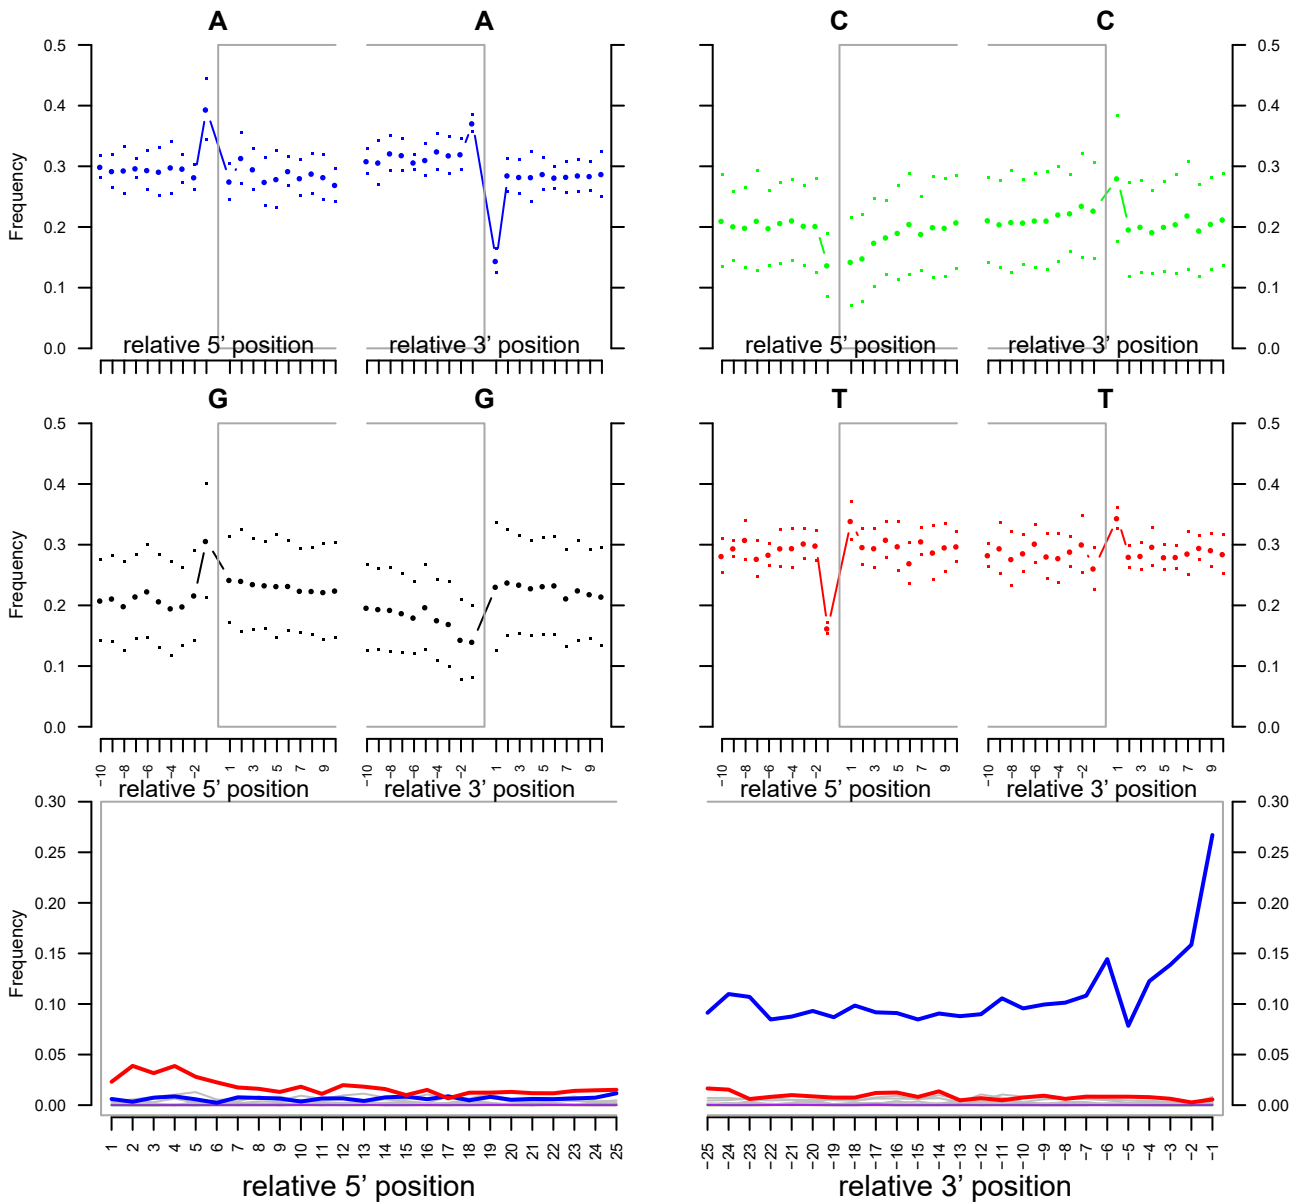

# Nucleotide mis-incorporation plot for sample Gan11

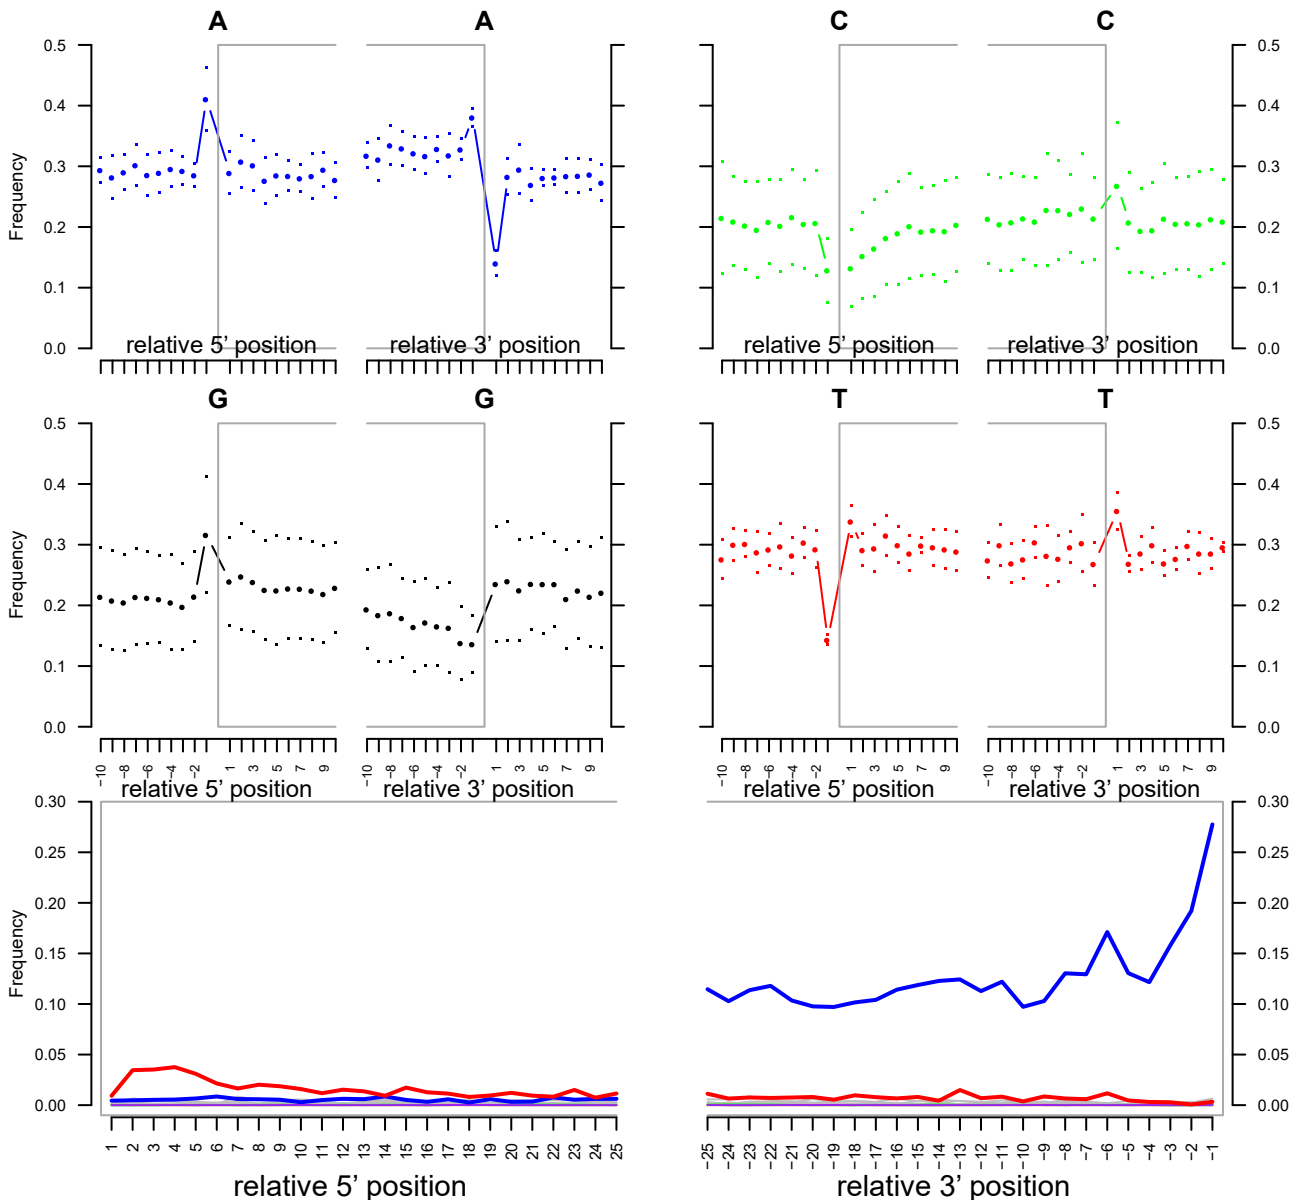

# Nucleotide mis-incorporation plot for sample Gan14

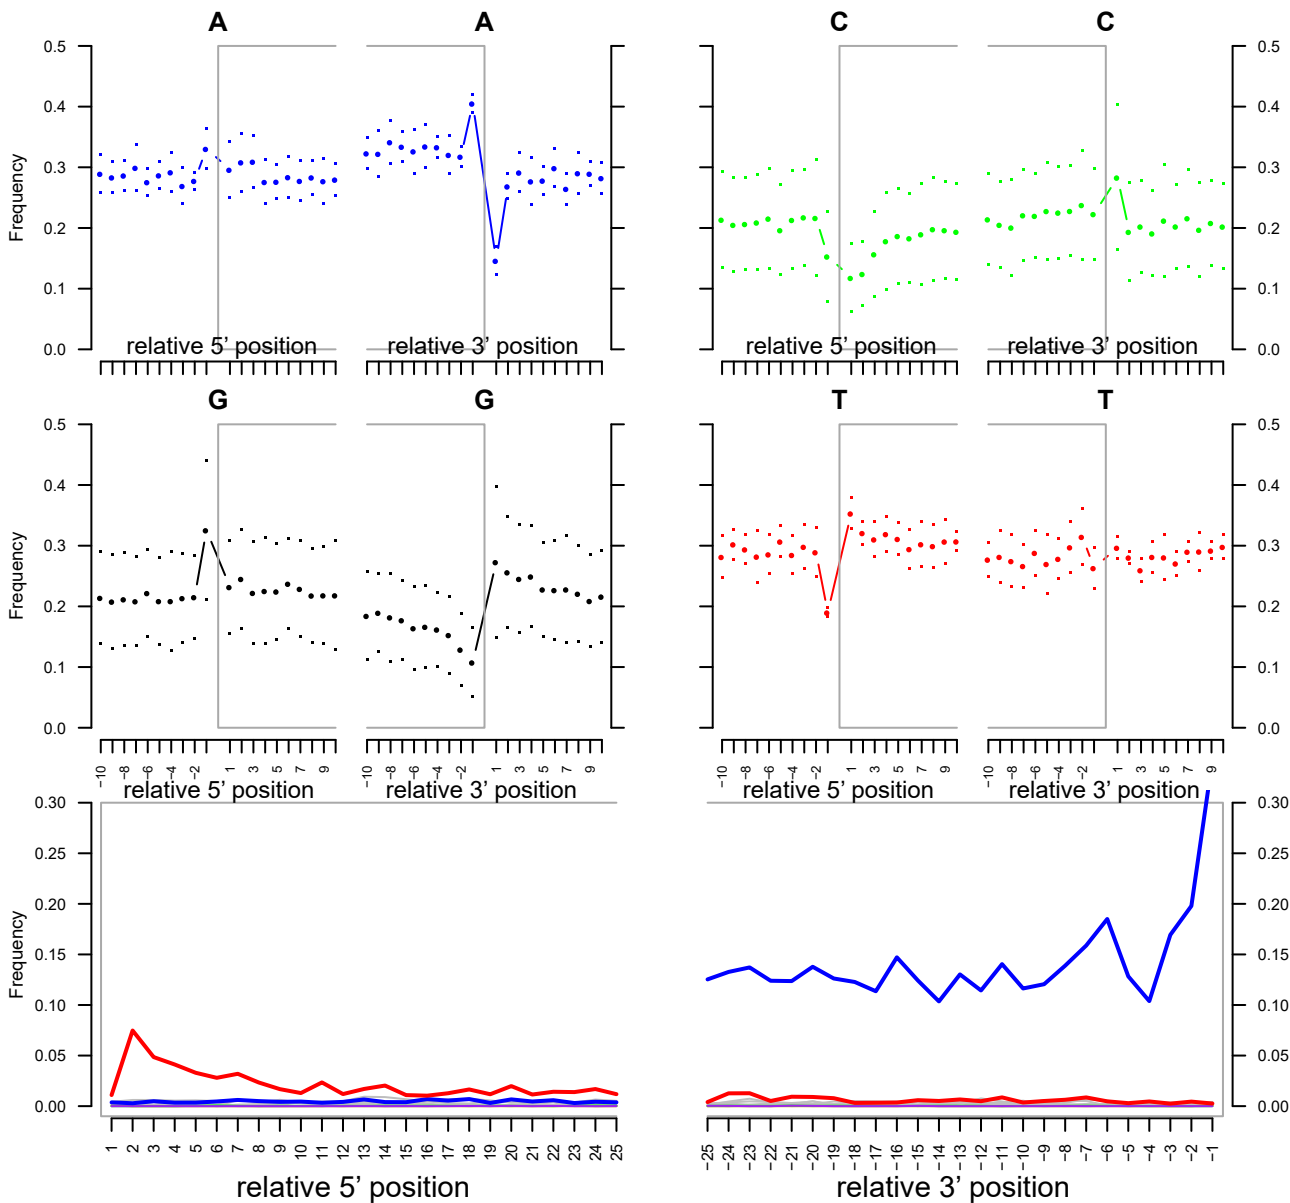

# Nucleotide mis-incorporation plot for sample Gan18

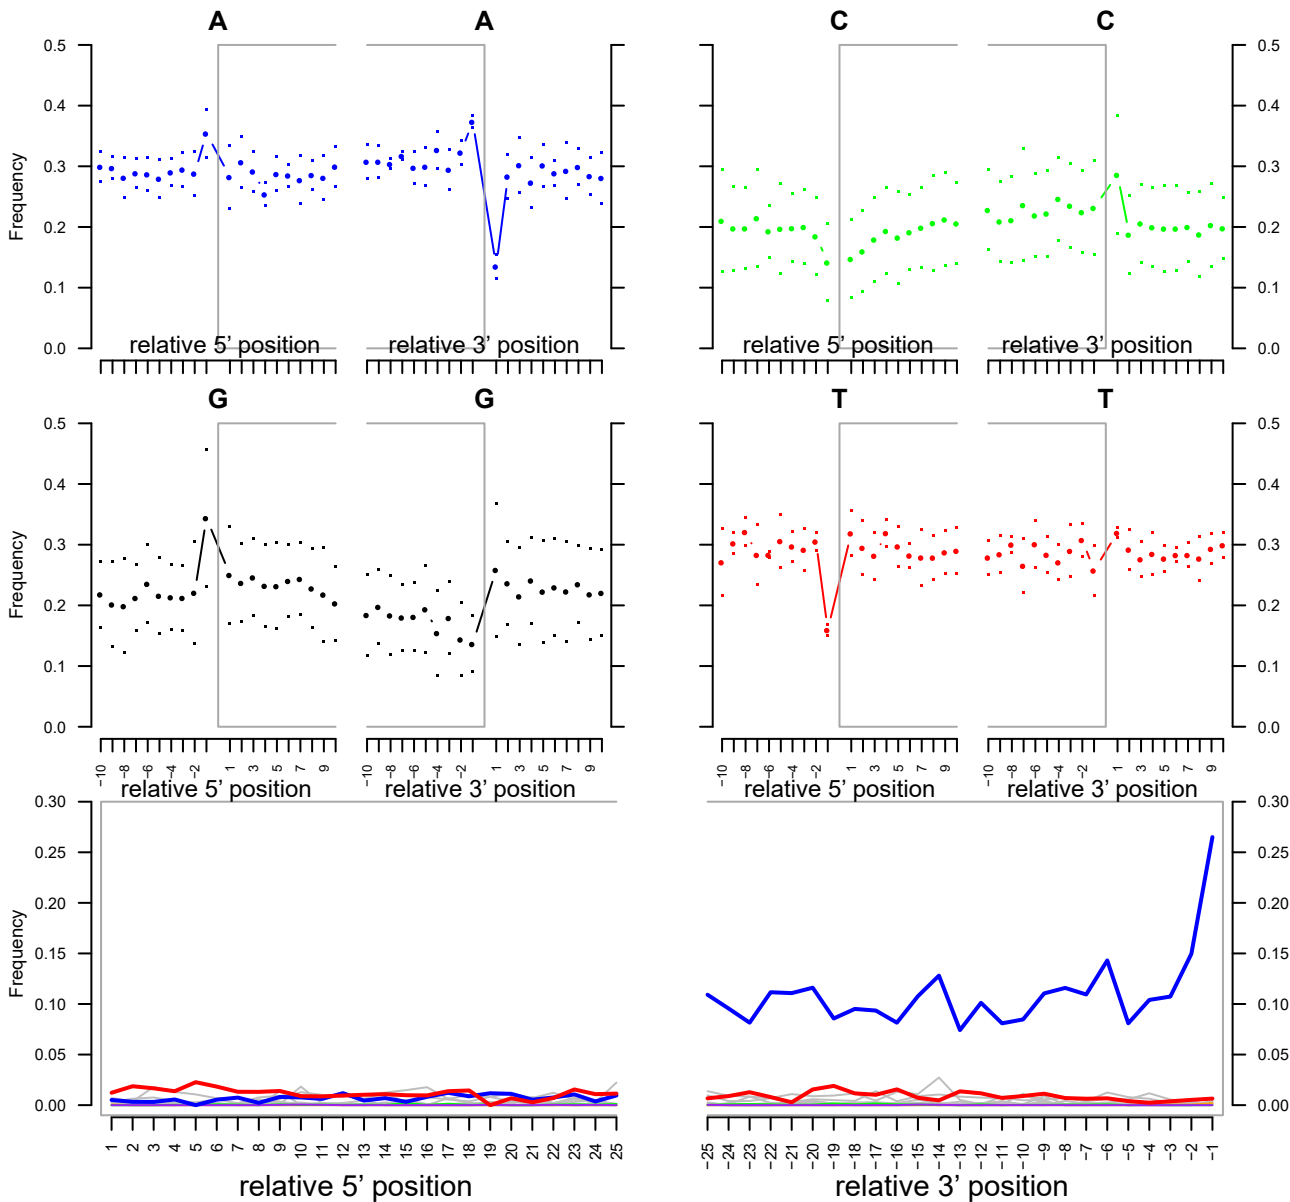

Supplement: s1 [file s1]
