# Supplementary material for: Traces of Late Bronze and Early Iron Age Mongolian Horse Mitochondrial Lineages in Modern Populations
Source: MDPI journal article supplement (doi:10.3390/genes12030412), 2021-03-12
Supplement: s1 [file s1]

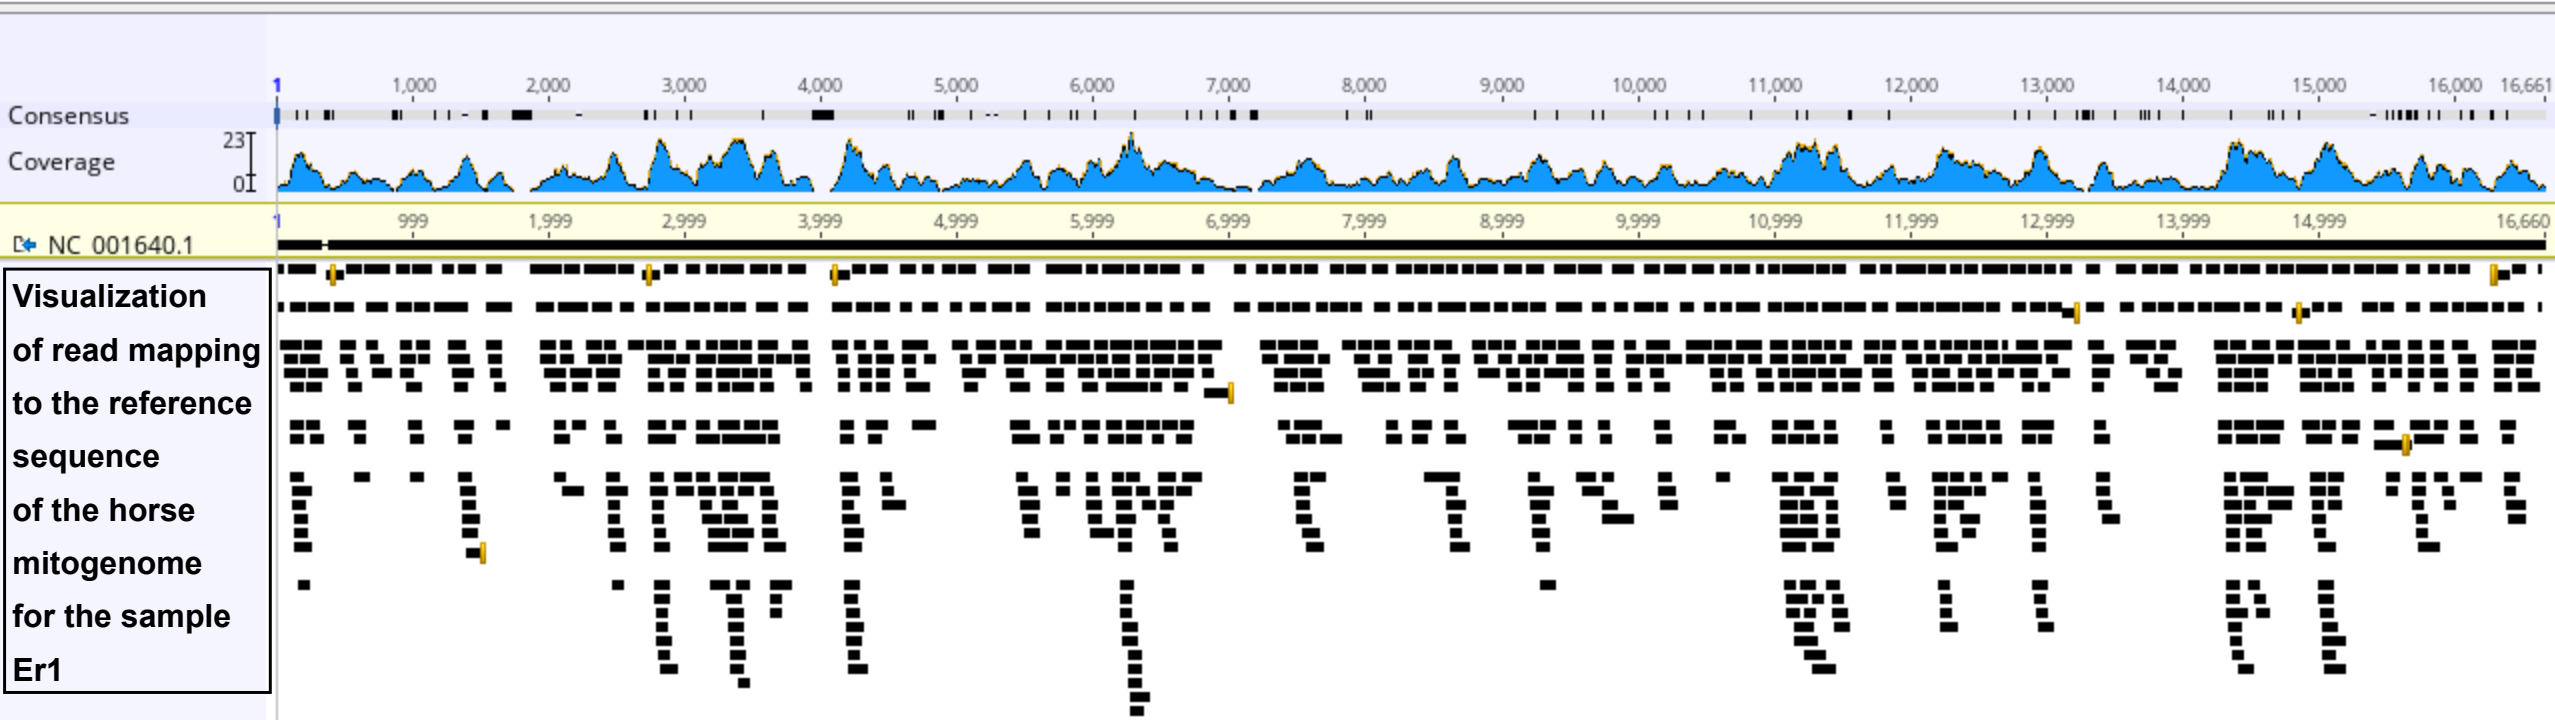

## Statistics

### Nucleotide Statistics:

Length: 16,661 bp

Sequences: 918

Identical Sites: 15,510 (95.6%)

Pairwise Identity: 98.8%

Coverage (restricted):

Mean: - Std Dev: -

Minimum: - Maximum: -

Forward: - Reverse: -

Ref-Seq: 97.3% (16,215 of 16,660)

Read Lengths (restricted):

Mean: - Std Dev: -

Minimum: - Maximum: -

Confidence Mean: (restricted)

Expected Errors: (restricted)

Error Free Odds: (restricted)

At least Q20: (restricted)

At least Q30: (restricted)

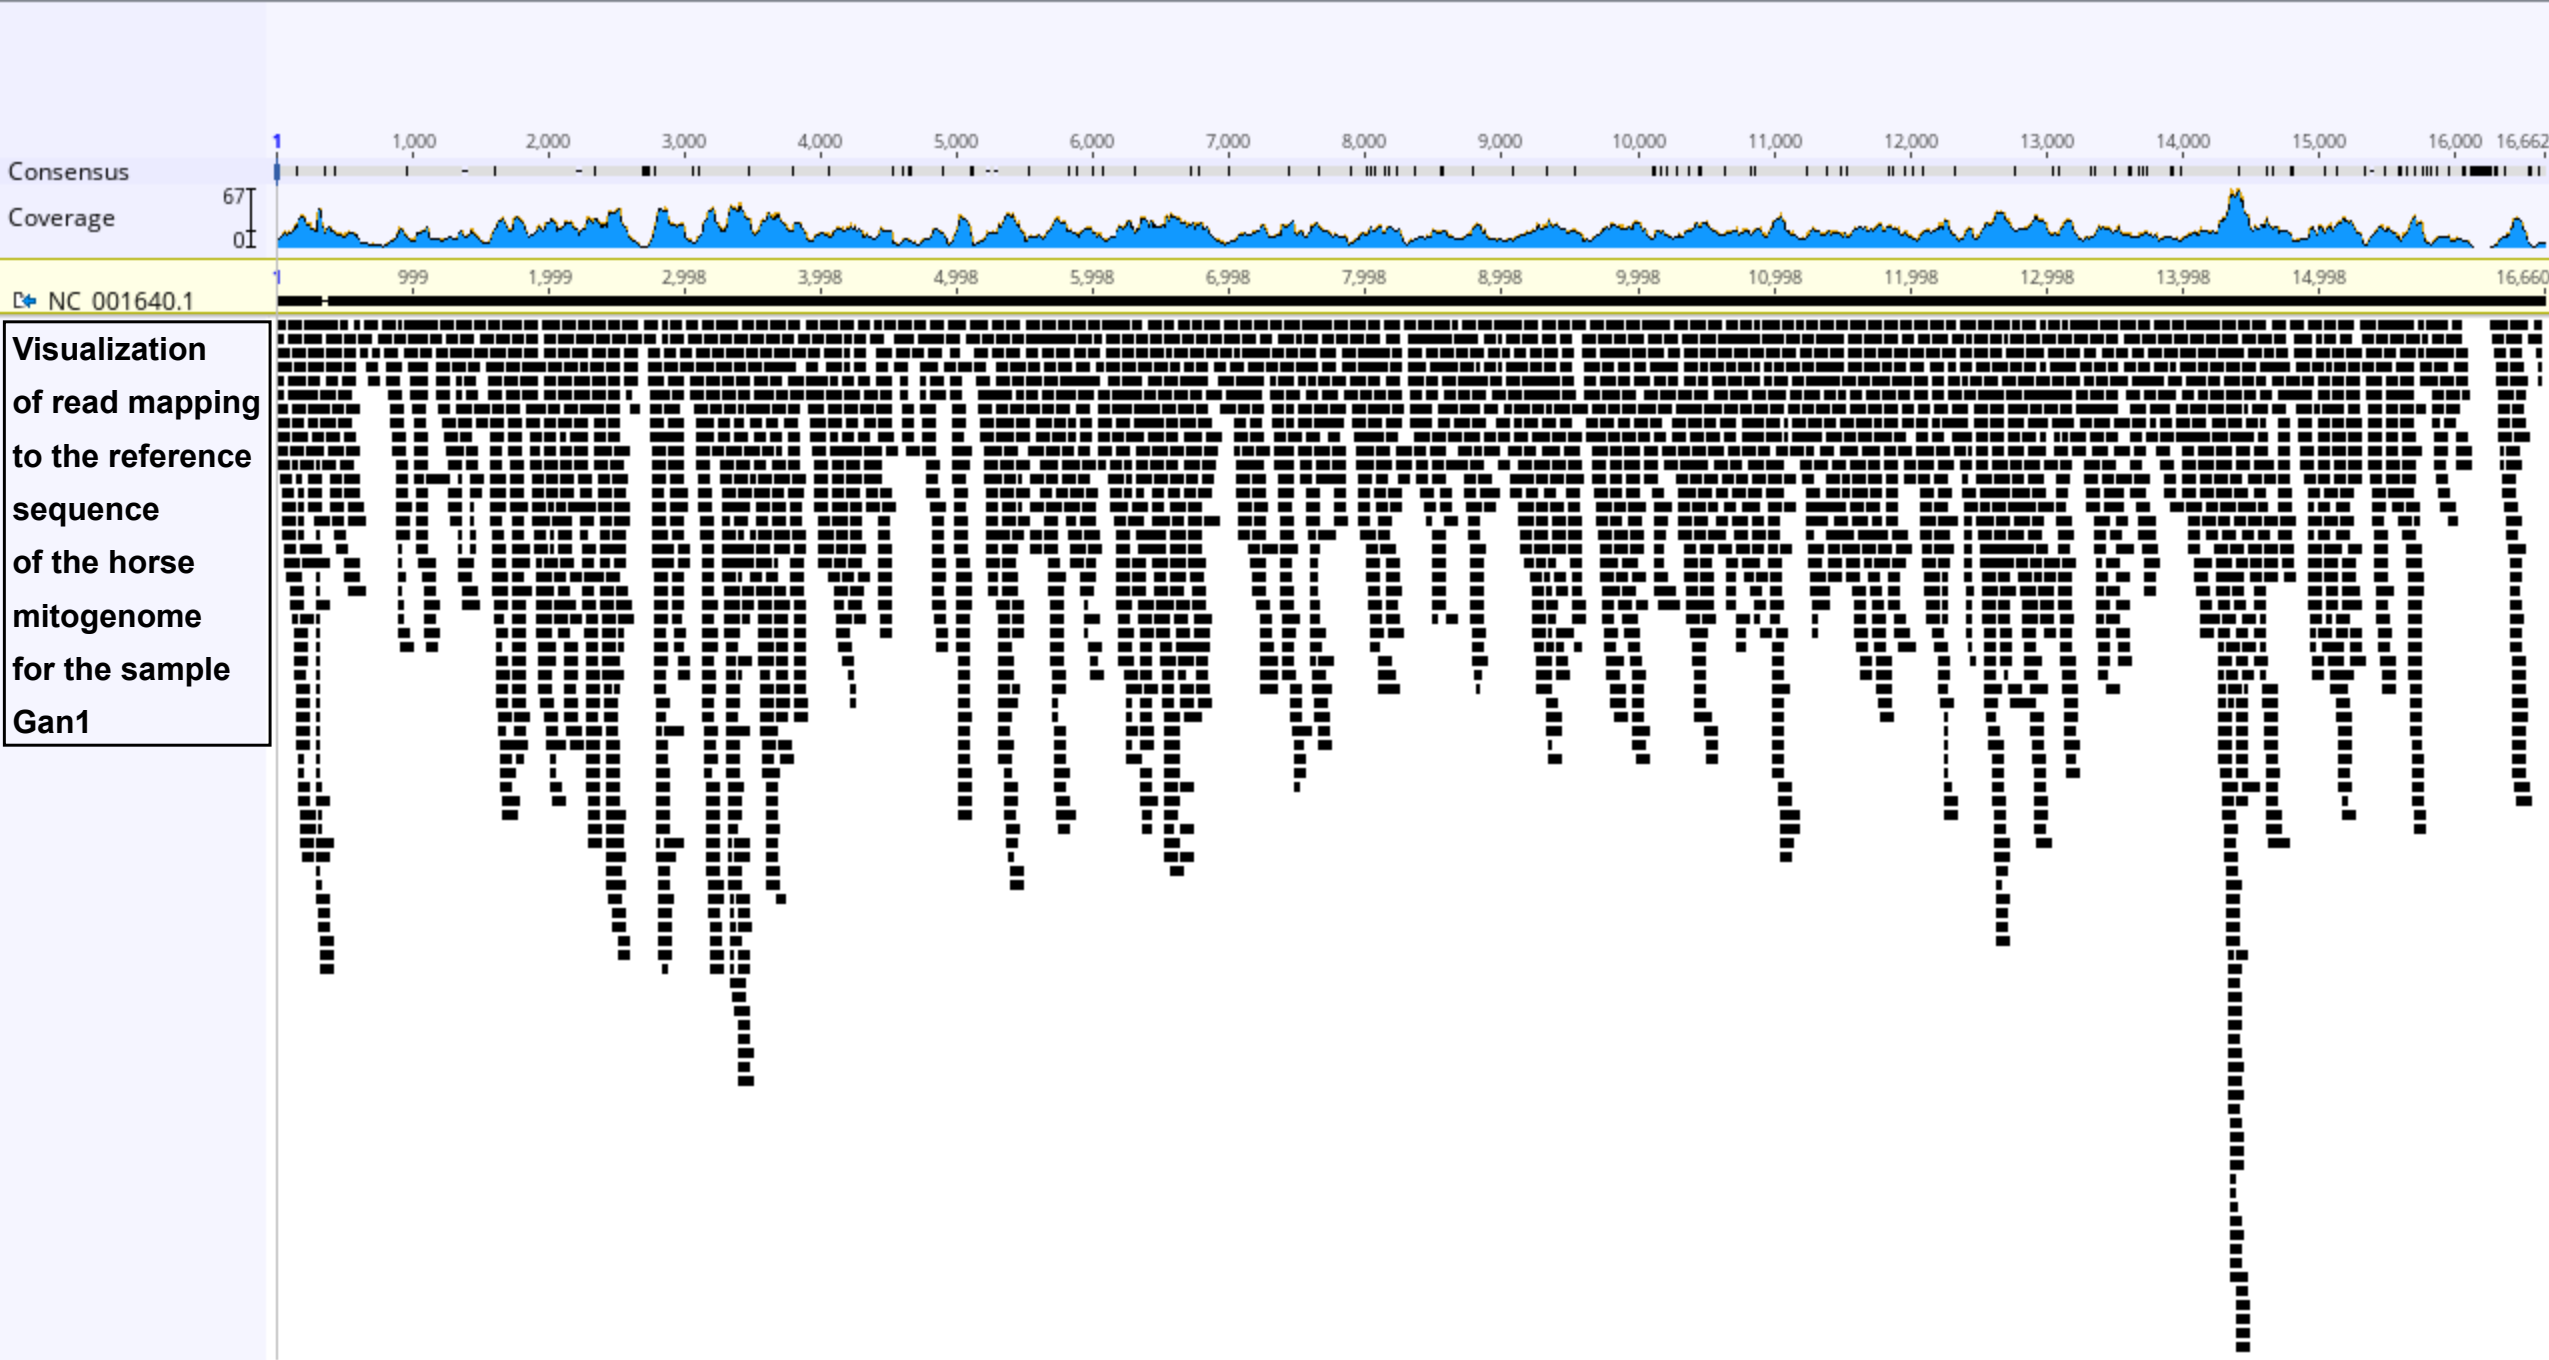

## Statistics

Stats include 1 hidden columns

### Nucleotide Statistics:

Length: 16,662 bp

Sequences: 3,144

Identical Sites: 13,578 (82.2%)

Pairwise Identity: 97.5%

### Coverage (restricted):

Mean: - Std Dev: -

Minimum: - Maximum: -

Forward: - Reverse: -

Ref-Seq: 99.1% (16,515 of 16,660)

### Read Lengths (restricted):

Mean: - Std Dev: -

Minimum: - Maximum: -

### Confidence Mean: (restricted)

Expected Errors: (restricted)

Error Free Odds: (restricted)

At least Q20: (restricted)

At least Q30: (restricted)

At least Q40: (restricted)

Rough Tm: (restricted)

|    | Freq    | % of non-gaps |
|----|---------|---------------|
| A: | 105,747 | 32.4%         |
| C: | 90,273  | 27.6%         |
| G: | 43,262  | 13.2%         |
| T: | 87,395  | 26.8%         |

GC: 133,535 40.9%

All: 326,677 100.0%

-: 106 0.0% (of any)

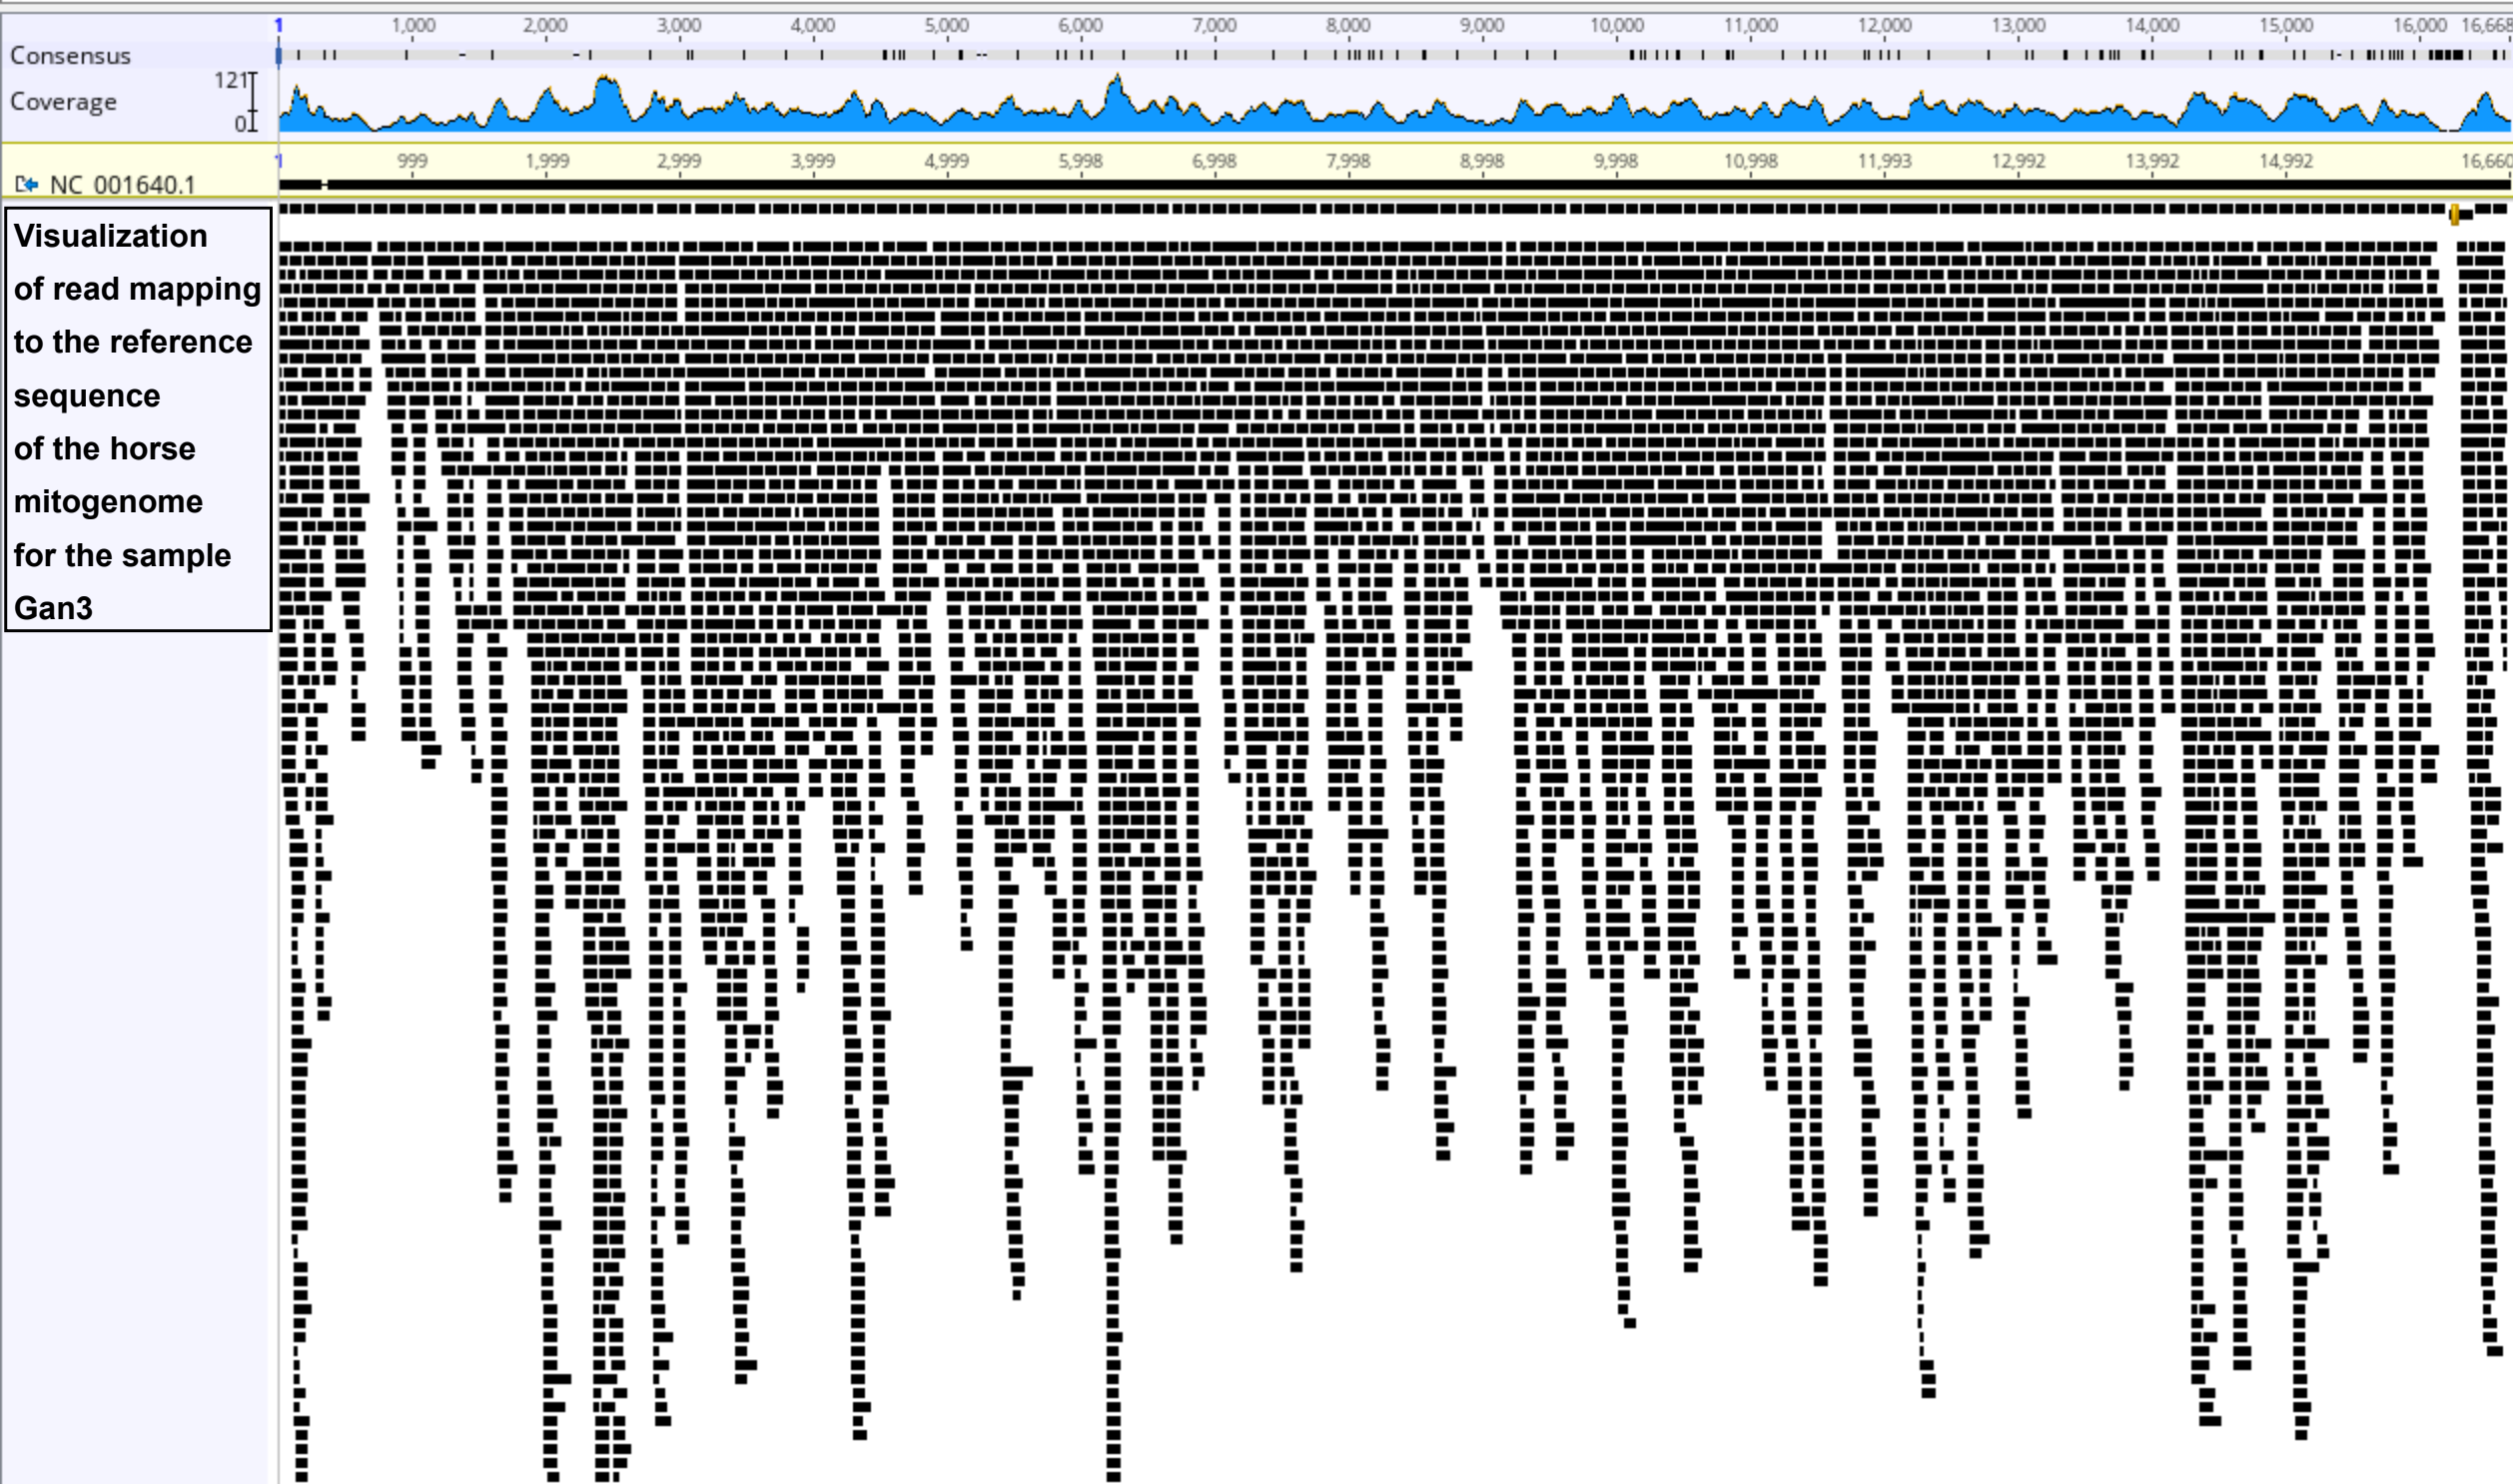

#### Statistics

Stats include 7 hidden columns

#### Nucleotide Statistics:

Length: 16,668 bp

Sequences: 6,920

Identical Sites: 11,653 (70.1%)

Pairwise Identity: 97.0%

#### Coverage (restricted):

Mean: - Std Dev: -

Minimum: - Maximum: -

Forward: - Reverse: -

Ref-Seq: 99.8% (16,624 of 16,660)

#### Read Lengths (restricted):

Mean: - Std Dev: -

Minimum: - Maximum: -

#### Confidence Mean: (restricted)

Expected Errors: (restricted)

Error Free Odds: (restricted)

At least Q20: (restricted)

At least Q30: (restricted)

At least Q40: (restricted)

Rough Tm: (restricted)

|    | Freq    | % of non-gaps |
|----|---------|---------------|
| A: | 230,136 | 32.3%         |
| C: | 201,204 | 28.2%         |
| G: | 93,652  | 13.1%         |
| T: | 188,039 | 26.4%         |
| R: | 2       | 0.0%          |

GC: 294,856 41.4%

All: 713,033 100.0%

-: 679 0.1% (of any)

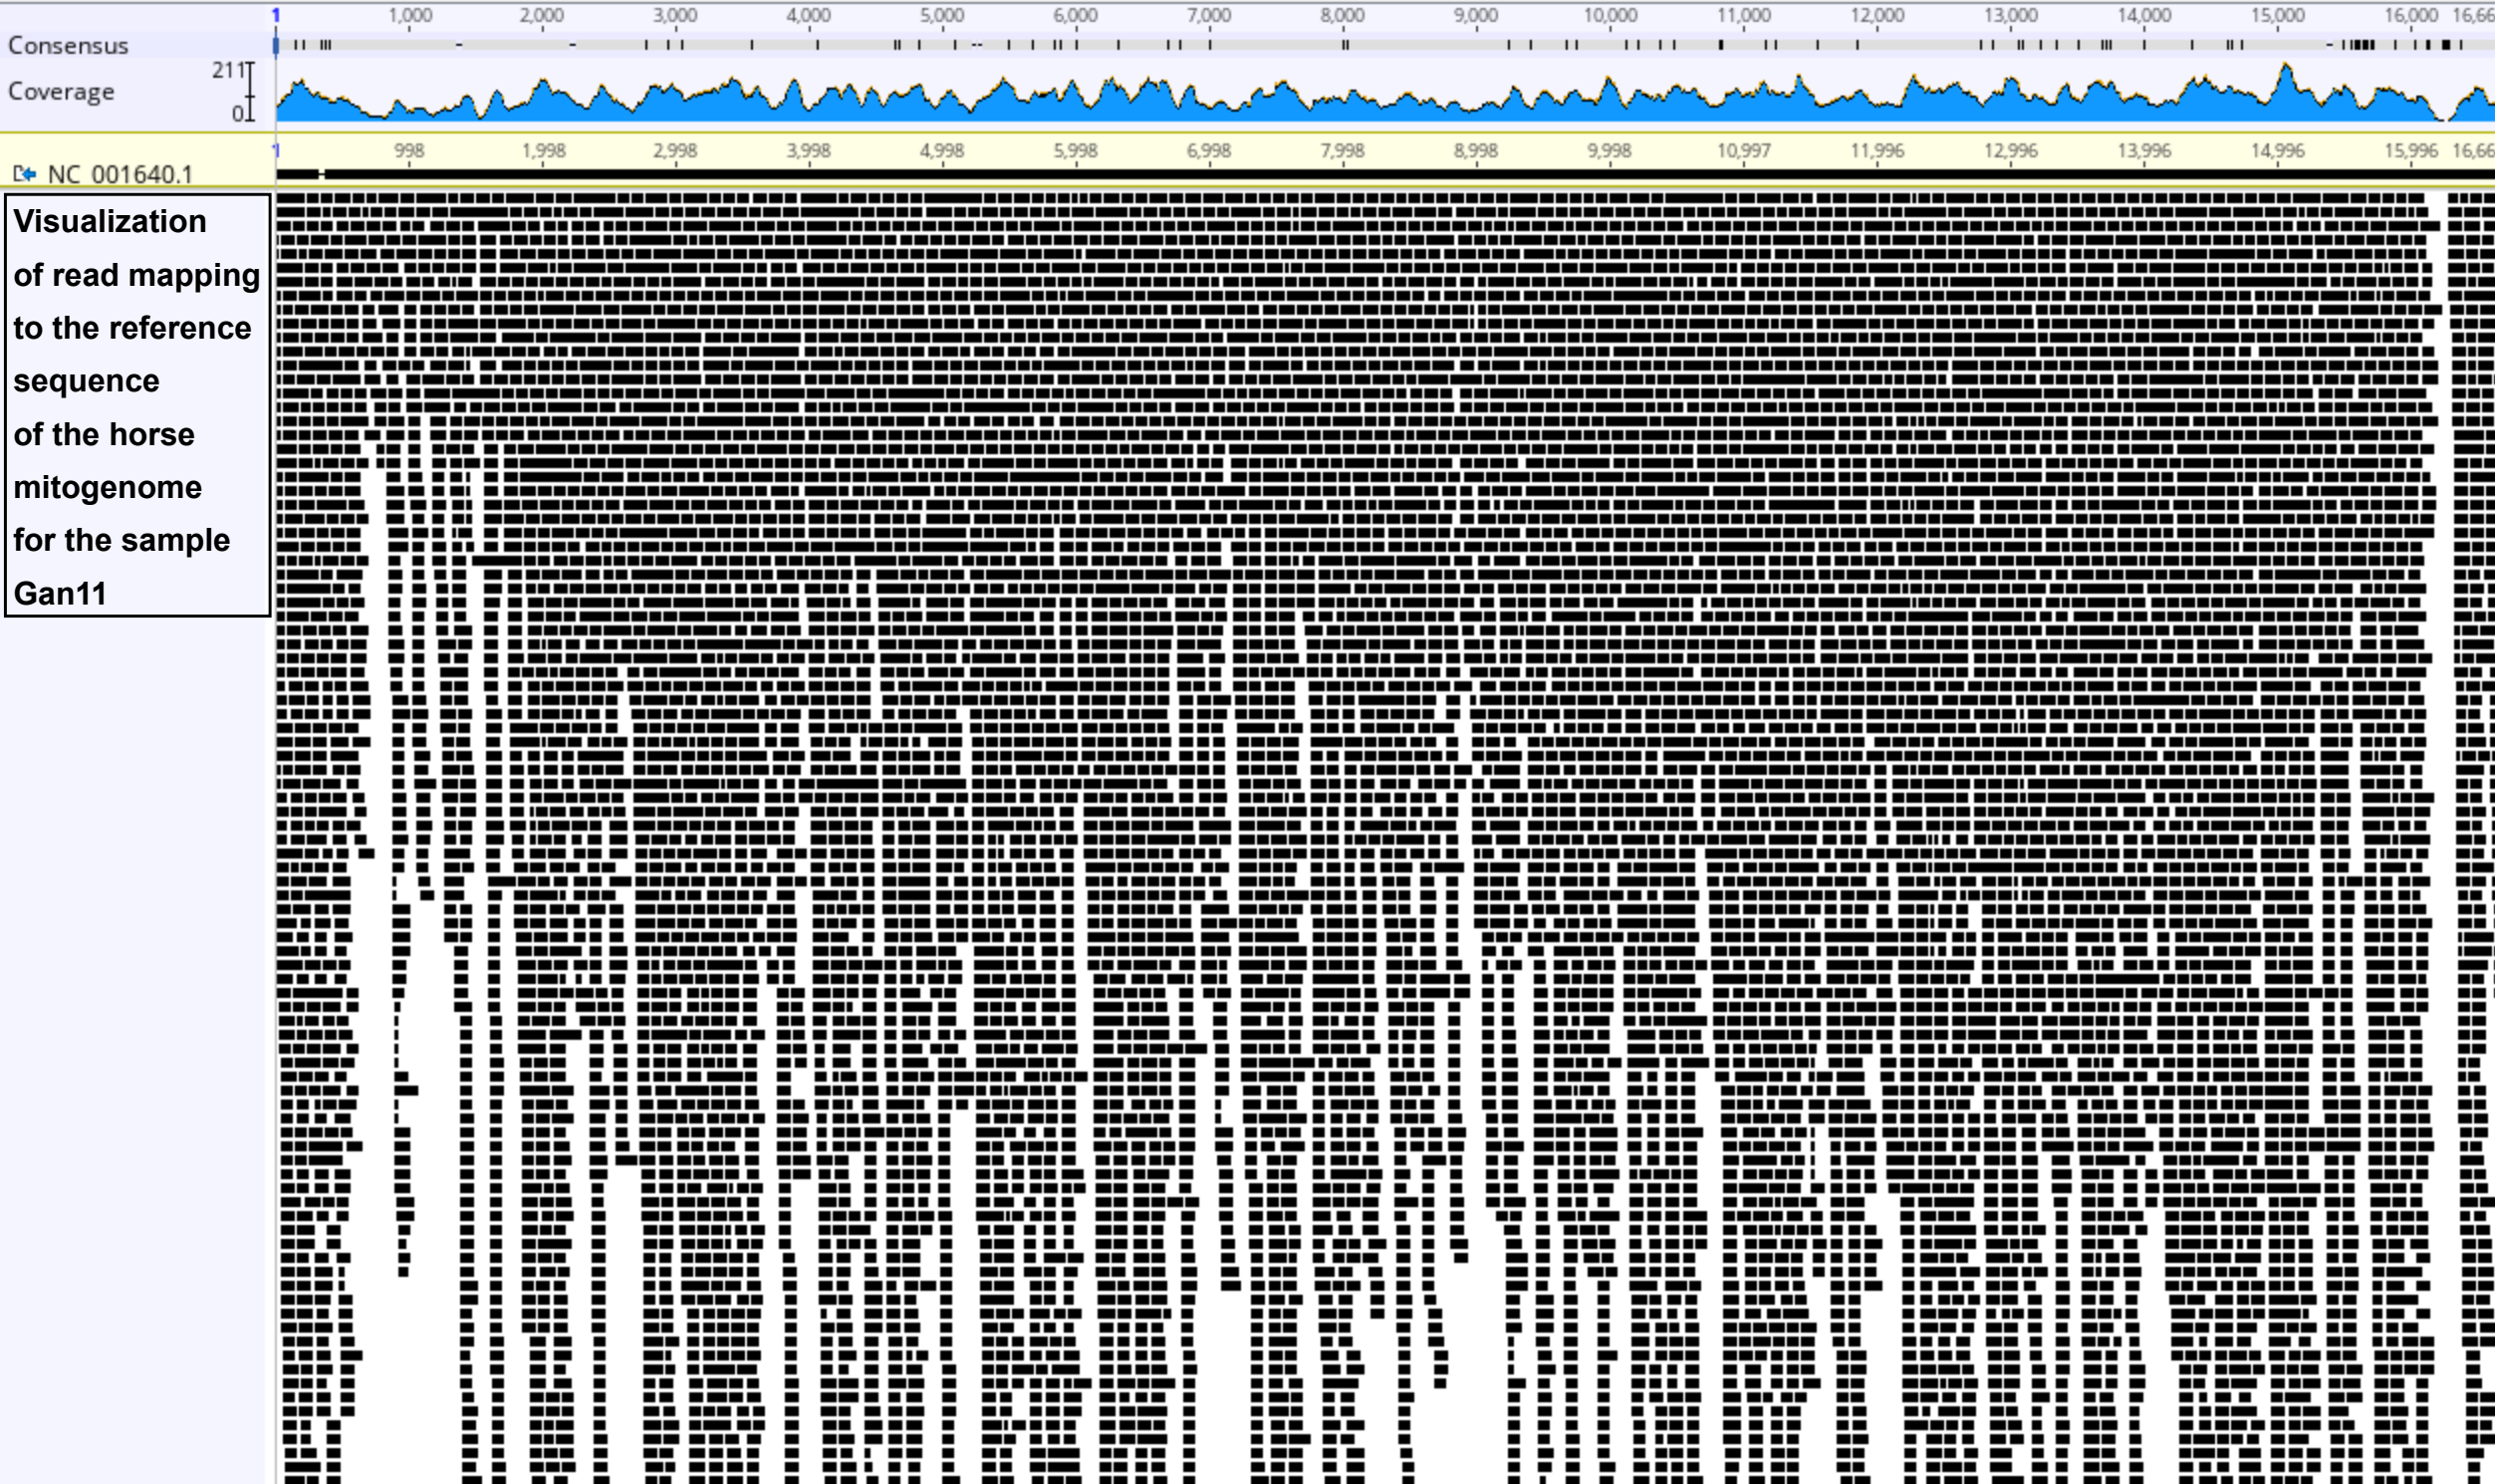

## Statistics

Stats include 4 hidden columns

### Nucleotide Statistics:

Length: 16,665 bp  
Sequences: 13,894  
Identical Sites: 10,378 (62.4%)  
Pairwise Identity: 96.9%

### Coverage (restricted):

Mean: - Std Dev: -  
Minimum: - Maximum: -  
Forward: - Reverse: -  
Ref-Seq: 99.7% (16,618 of 16,660)

### Read Lengths (restricted):

Mean: - Std Dev: -  
Minimum: - Maximum: -

### Confidence Mean: (restricted)

Expected Errors: (restricted)

Error Free Odds: (restricted)

At least Q20: (restricted)

At least Q30: (restricted)

At least Q40: (restricted)

Rough Tm: (restricted)

|      | Freq      | % of non-gaps |
|------|-----------|---------------|
| A:   | 468,982   | 32.4%         |
| C:   | 410,694   | 28.4%         |
| G:   | 185,192   | 12.8%         |
| T:   | 383,016   | 26.5%         |
| GC:  | 595,886   | 41.2%         |
| All: | 1,447,884 | 100.0%        |
| -:   | 741       | 0.1% (of any) |

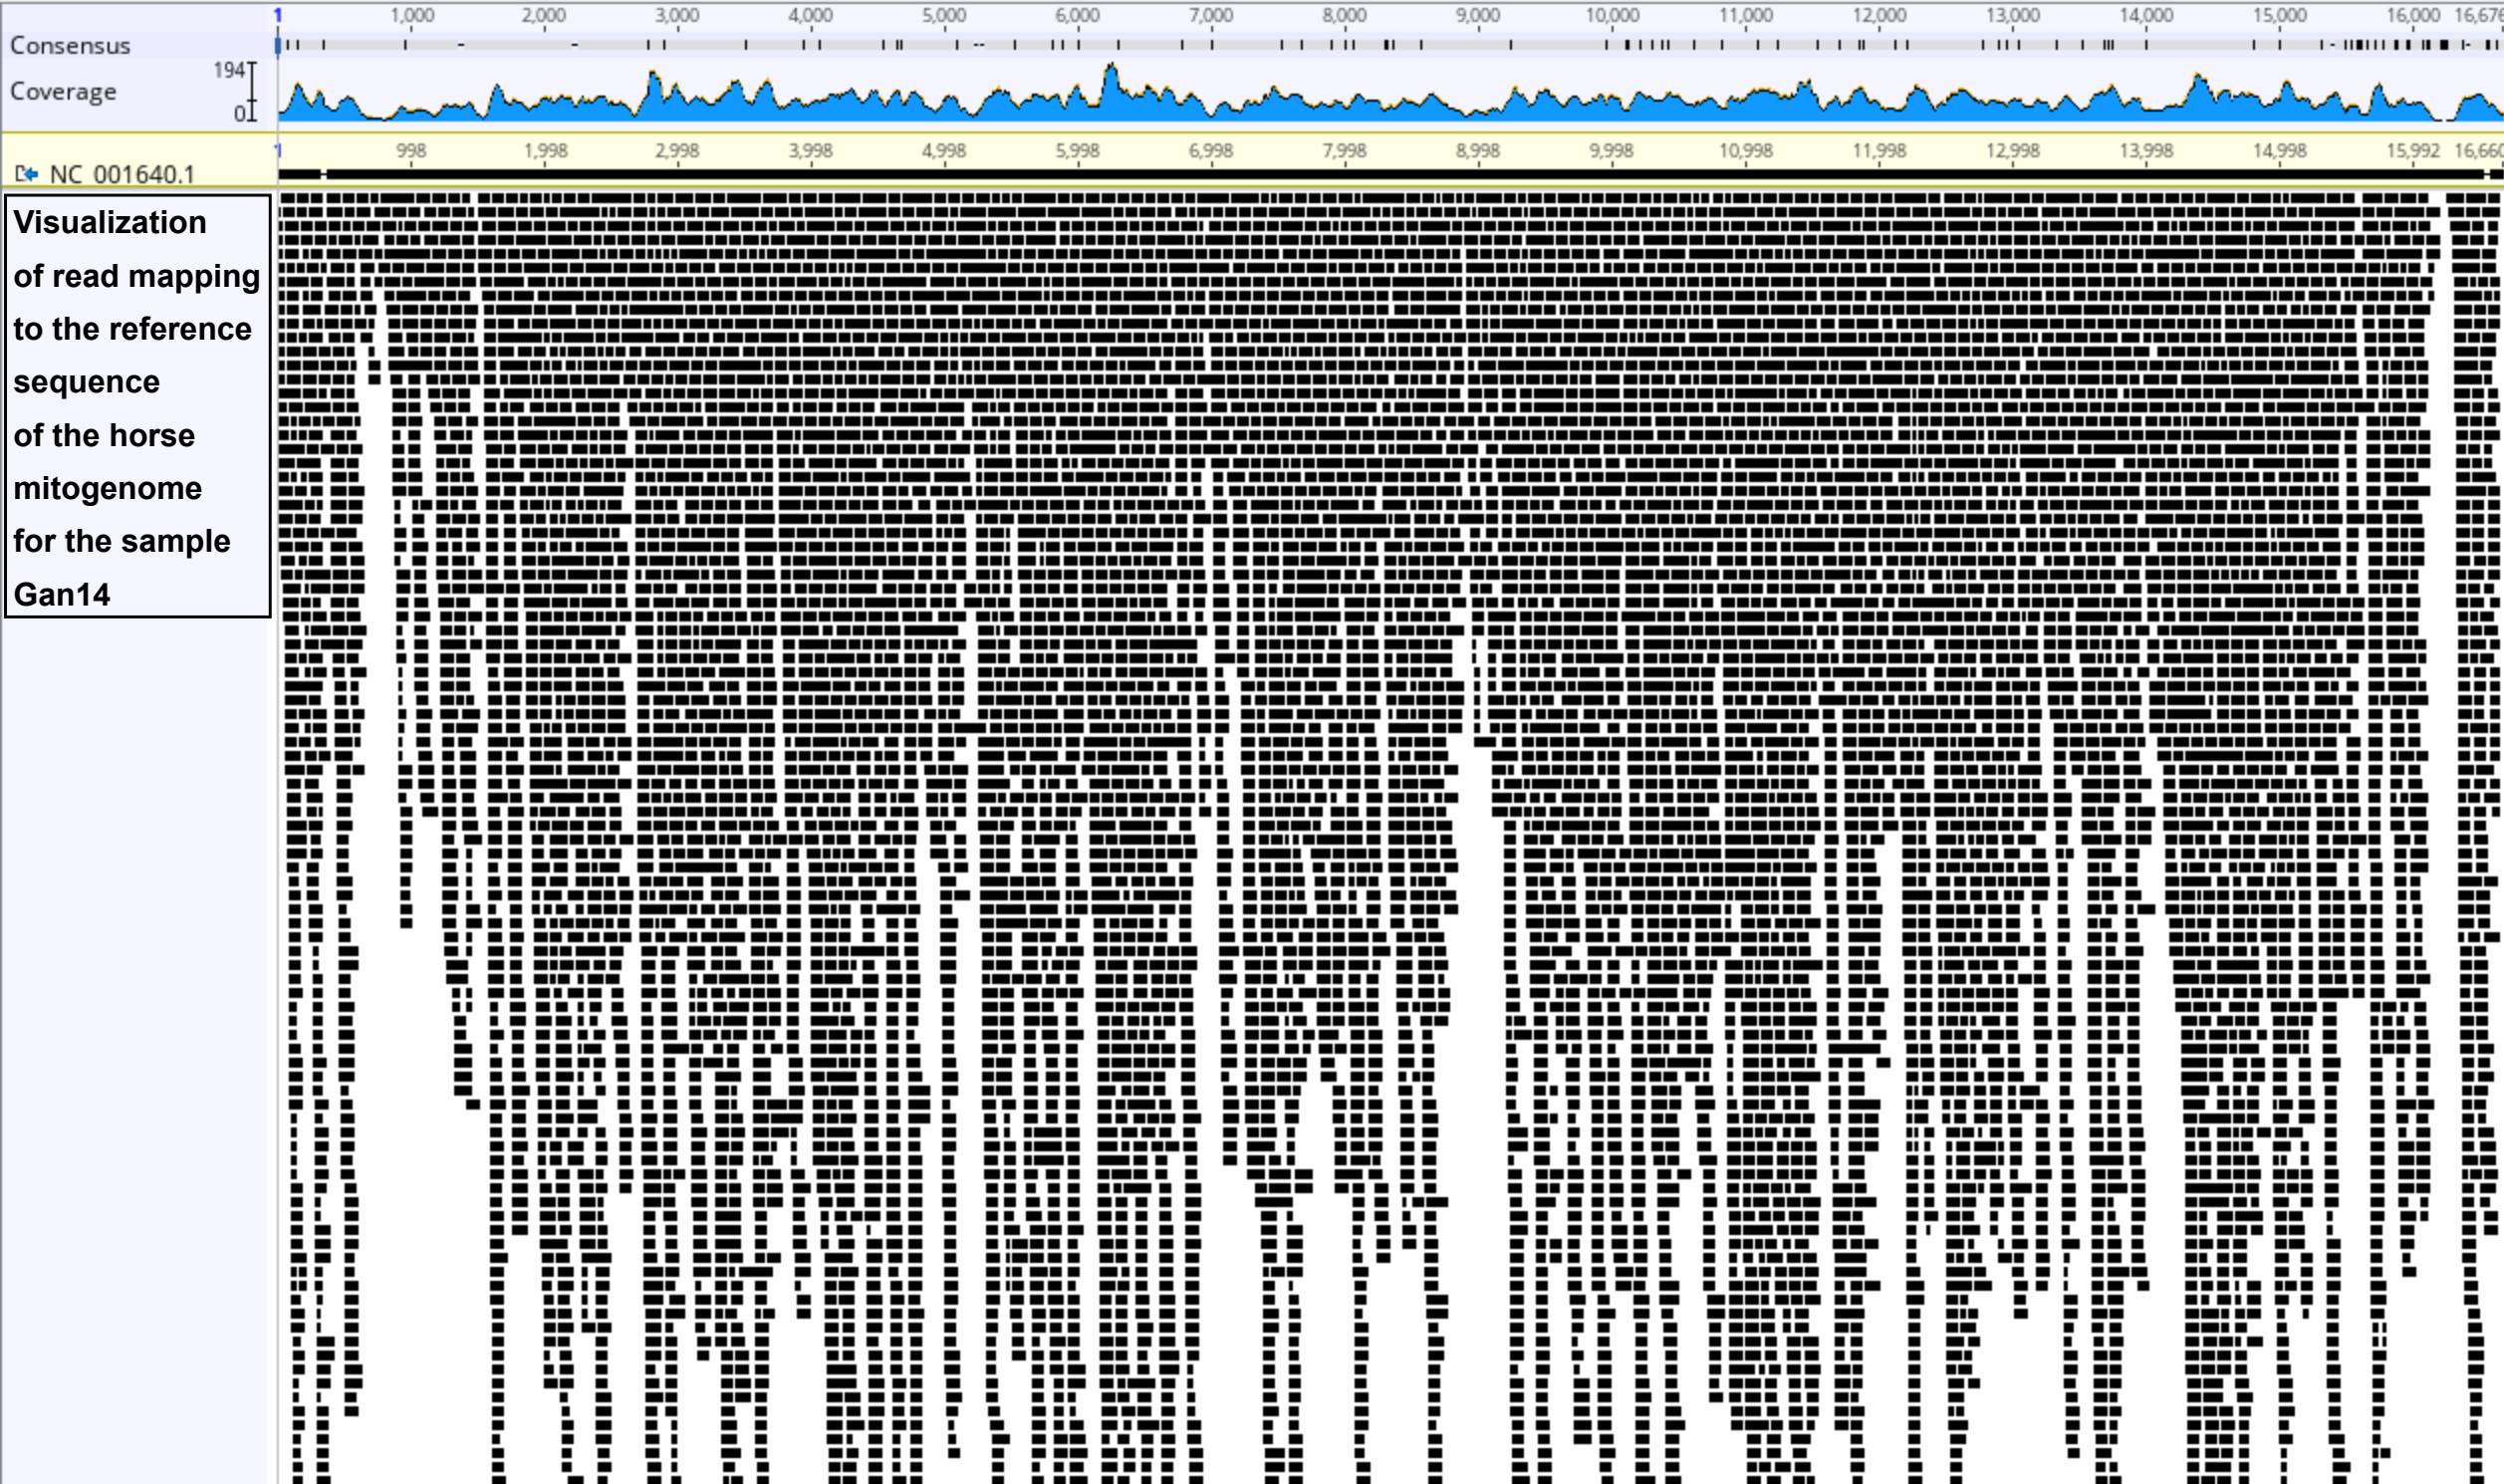

## Statistics

Stats include 14 hidden columns

### Nucleotide Statistics:

Length: 16,676 bp

Sequences: 11,644

Identical Sites: 10,523 (63.2%)

Pairwise Identity: 96.7%

### Coverage (restricted):

Mean: - Std Dev: -

Minimum: - Maximum: -

Forward: - Reverse: -

Ref-Seq: 99.8% (16,622 of 16,660)

### Read Lengths (restricted):

Mean: - Std Dev: -

Minimum: - Maximum: -

### Confidence Mean: (restricted)

Expected Errors: (restricted)

Error Free Odds: (restricted)

At least Q20: (restricted)

At least Q30: (restricted)

At least Q40: (restricted)

Rough Tm: (restricted)

|      | Freq      | % of non-gaps |
|------|-----------|---------------|
| A:   | 367,495   | 32.6%         |
| C:   | 314,396   | 27.9%         |
| G:   | 144,211   | 12.8%         |
| T:   | 301,502   | 26.7%         |
| GC:  | 458,607   | 40.7%         |
| All: | 1,127,604 | 100.0%        |
| -:   | 1,152     | 0.1% (of any) |

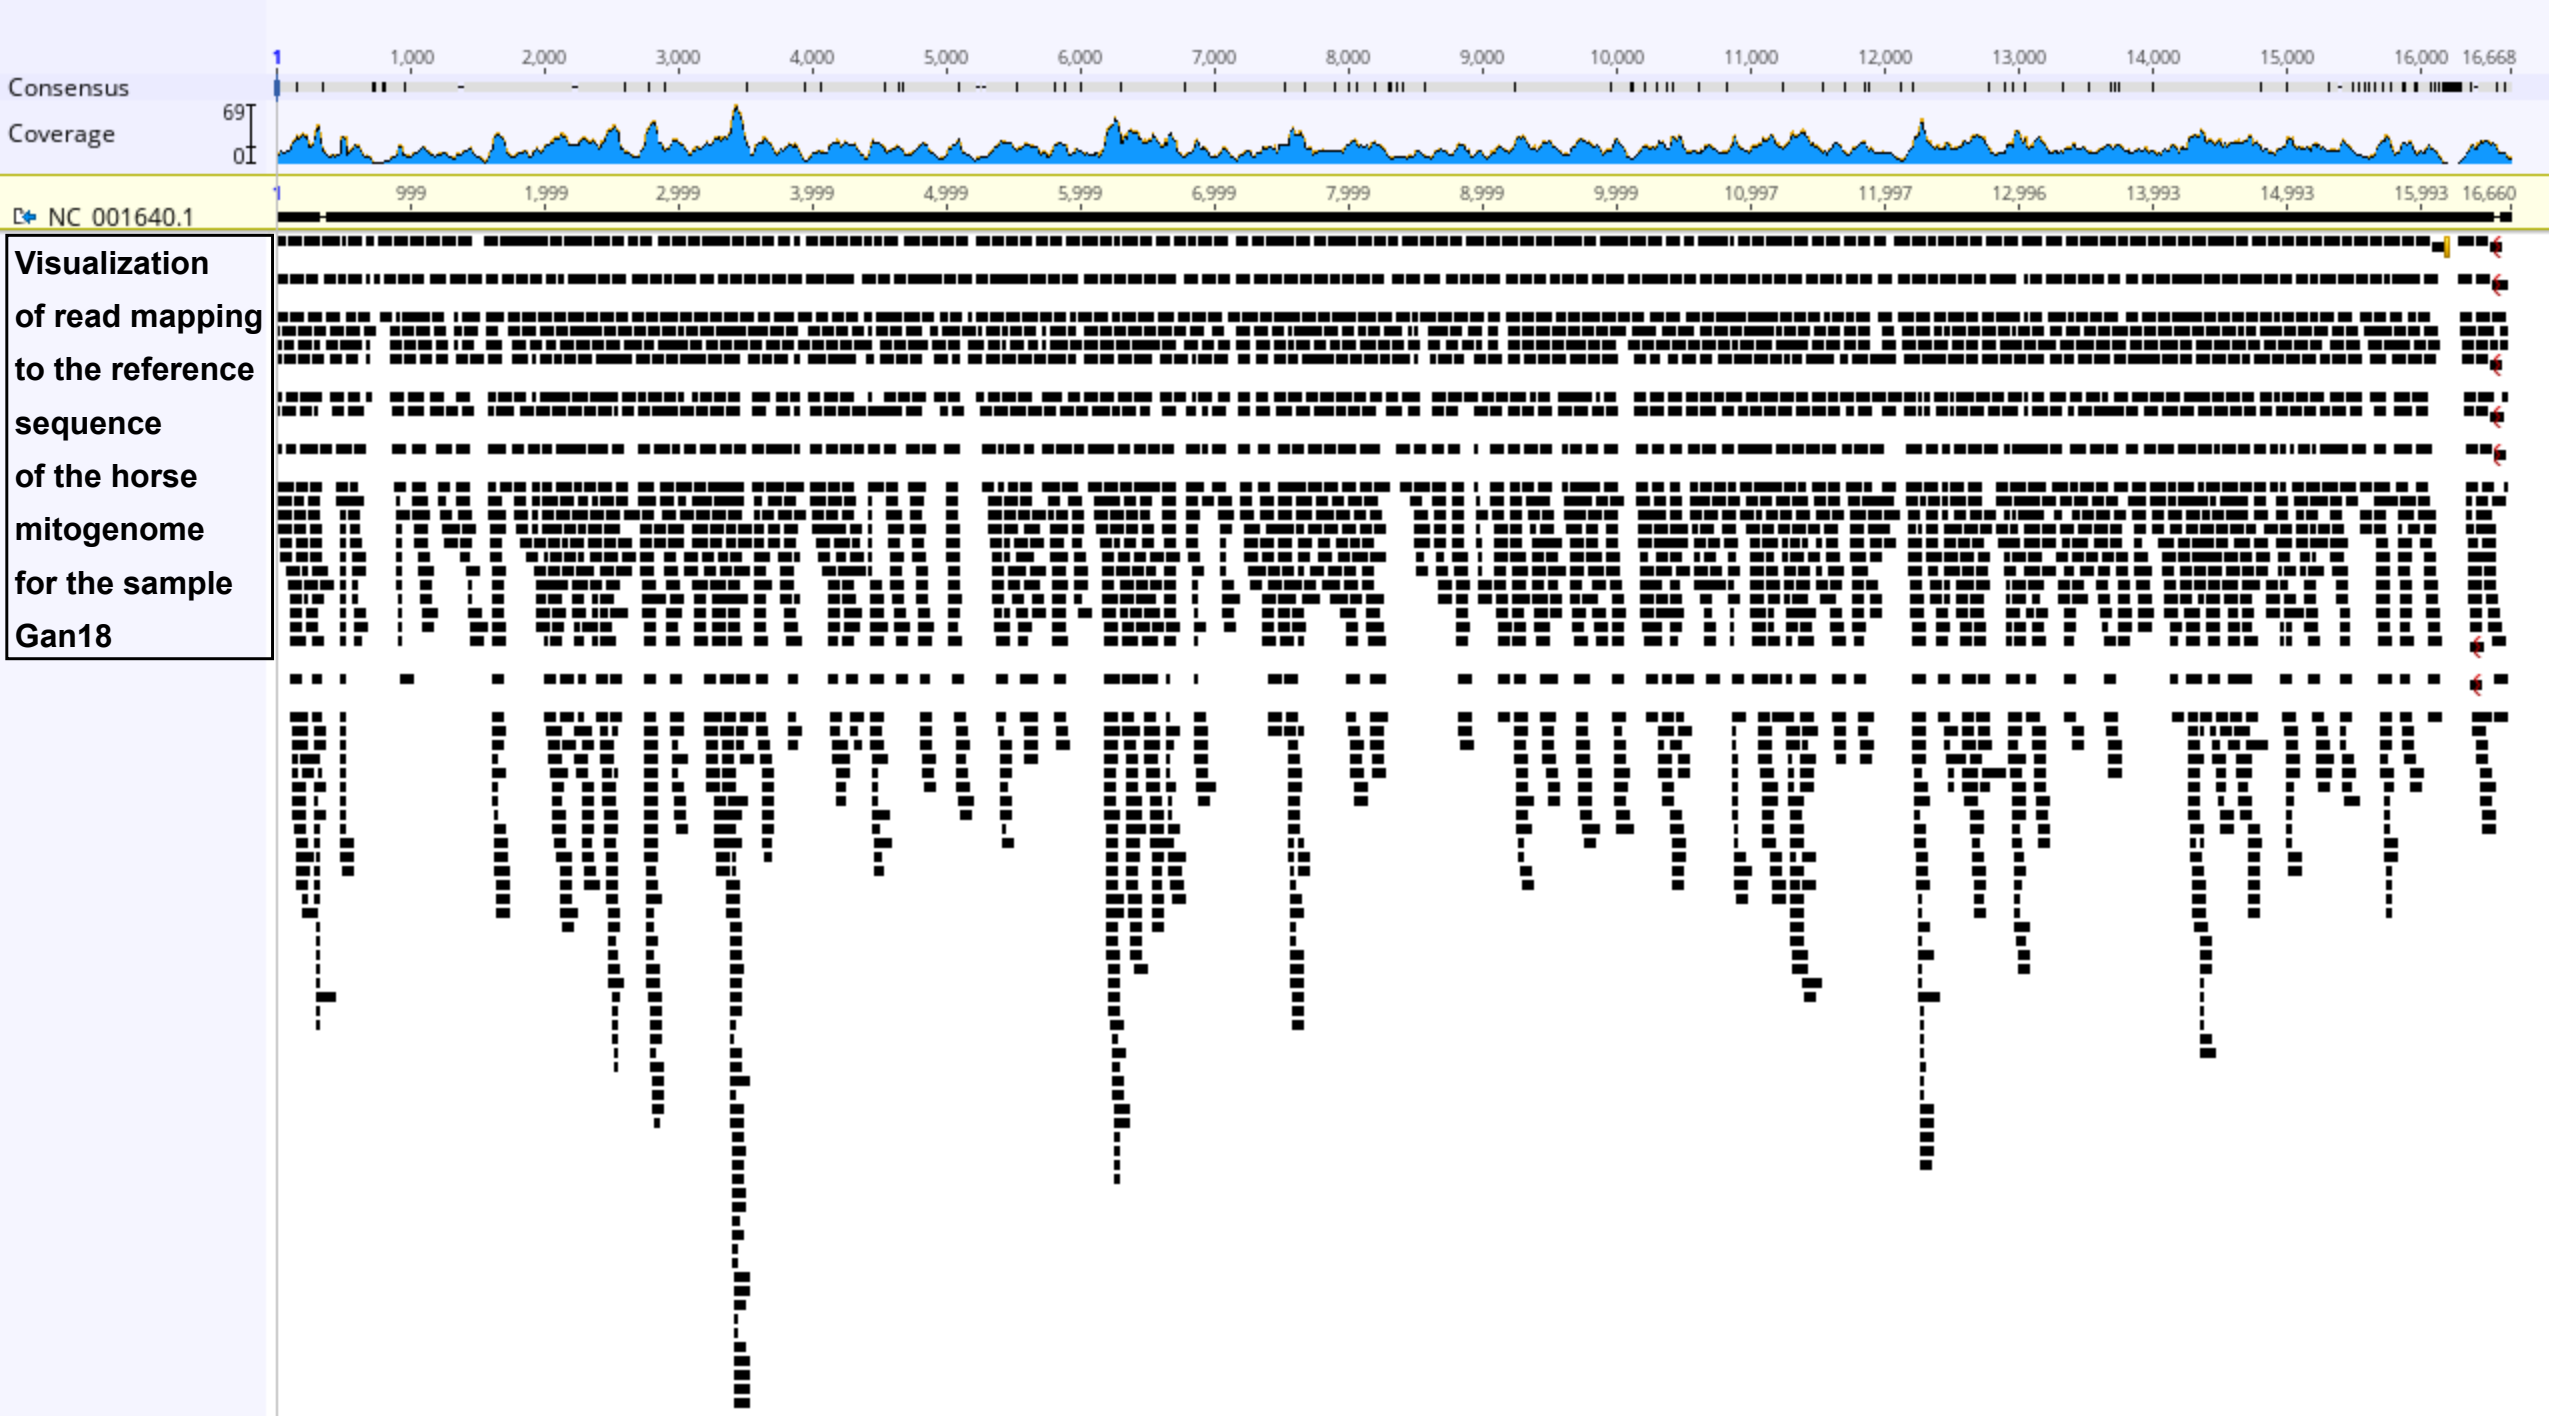

|                                   |         |               |
|-----------------------------------|---------|---------------|
| Stats include 6 hidden columns    |         |               |
| Nucleotide Statistics:            |         |               |
| Length: 16,668 bp                 |         |               |
| Sequences: 3,323                  |         |               |
| Identical Sites: 13,135 (79.2%)   |         |               |
| Pairwise Identity: 96.9%          |         |               |
| Coverage (restricted):            |         |               |
| Mean: - Std Dev: -                |         |               |
| Minimum: - Maximum: -             |         |               |
| Forward: - Reverse: -             |         |               |
| Ref-Seq: 99.5% (16,570 of 16,660) |         |               |
| Read Lengths (restricted):        |         |               |
| Mean: - Std Dev: -                |         |               |
| Minimum: - Maximum: -             |         |               |
| Confidence Mean: (restricted)     |         |               |
| Expected Errors: (restricted)     |         |               |
| Error Free Odds: (restricted)     |         |               |
| At least Q20: (restricted)        |         |               |
| At least Q30: (restricted)        |         |               |
| At least Q40: (restricted)        |         |               |
| Rough Tm: (restricted)            |         |               |
|                                   |         |               |
|                                   | Freq    | % of non-gaps |
| A:                                | 105,446 | 32.4%         |
| C:                                | 90,920  | 27.9%         |
| G:                                | 42,450  | 13.0%         |
| T:                                | 86,817  | 26.7%         |
| R:                                | 1       | 0.0%          |
|                                   |         |               |
| GC:                               | 133,370 | 41.0%         |
| All:                              | 325,634 | 100.0%        |
| -:                                | 201     | 0.1% (of any) |
