# Supplementary material for: Traces of Late Bronze and Early Iron Age Mongolian Horse Mitochondrial Lineages in Modern Populations
Source: Genes (Basel). 2021 Mar 12;12(3):412. doi: 10.3390/genes12030412 (PMC8000342; doi:10.3390/genes12030412)
Supplement: Supplementary file 1 [file genes-12-00412-s001.zip]

Archive with 7 entries (7 files):
- Figure S1. Ancient DNA damage patterns..pdf
- Figure S2. Read length distribution plot for the ancient sample libraries..pdf
- Figure S3. Visualization of the coverage depth of the obtained mitogenomes of ancient Mongolian horses..pdf
- Figure S4. Initial phylogenetic tree (with Equus asinus) built here showing the 95% height posterior density of age estimates..pdf
- Figure S5. Initial phylogenetic tree (without Equus asinus) built here showing the 95% height posterior density of age estimates..png
- Table S1. Information about bone specimens of the studied ancient horses..docx
- Table S2. Information about the mitogenome sequences from Genbank..docx
