# Supplementary figures and images for: Traces of Late Bronze and Early Iron Age Mongolian Horse Mitochondrial Lineages in Modern Populations
Source: MDPI journal article supplement (doi:10.3390/genes12030412), 2021-03-12

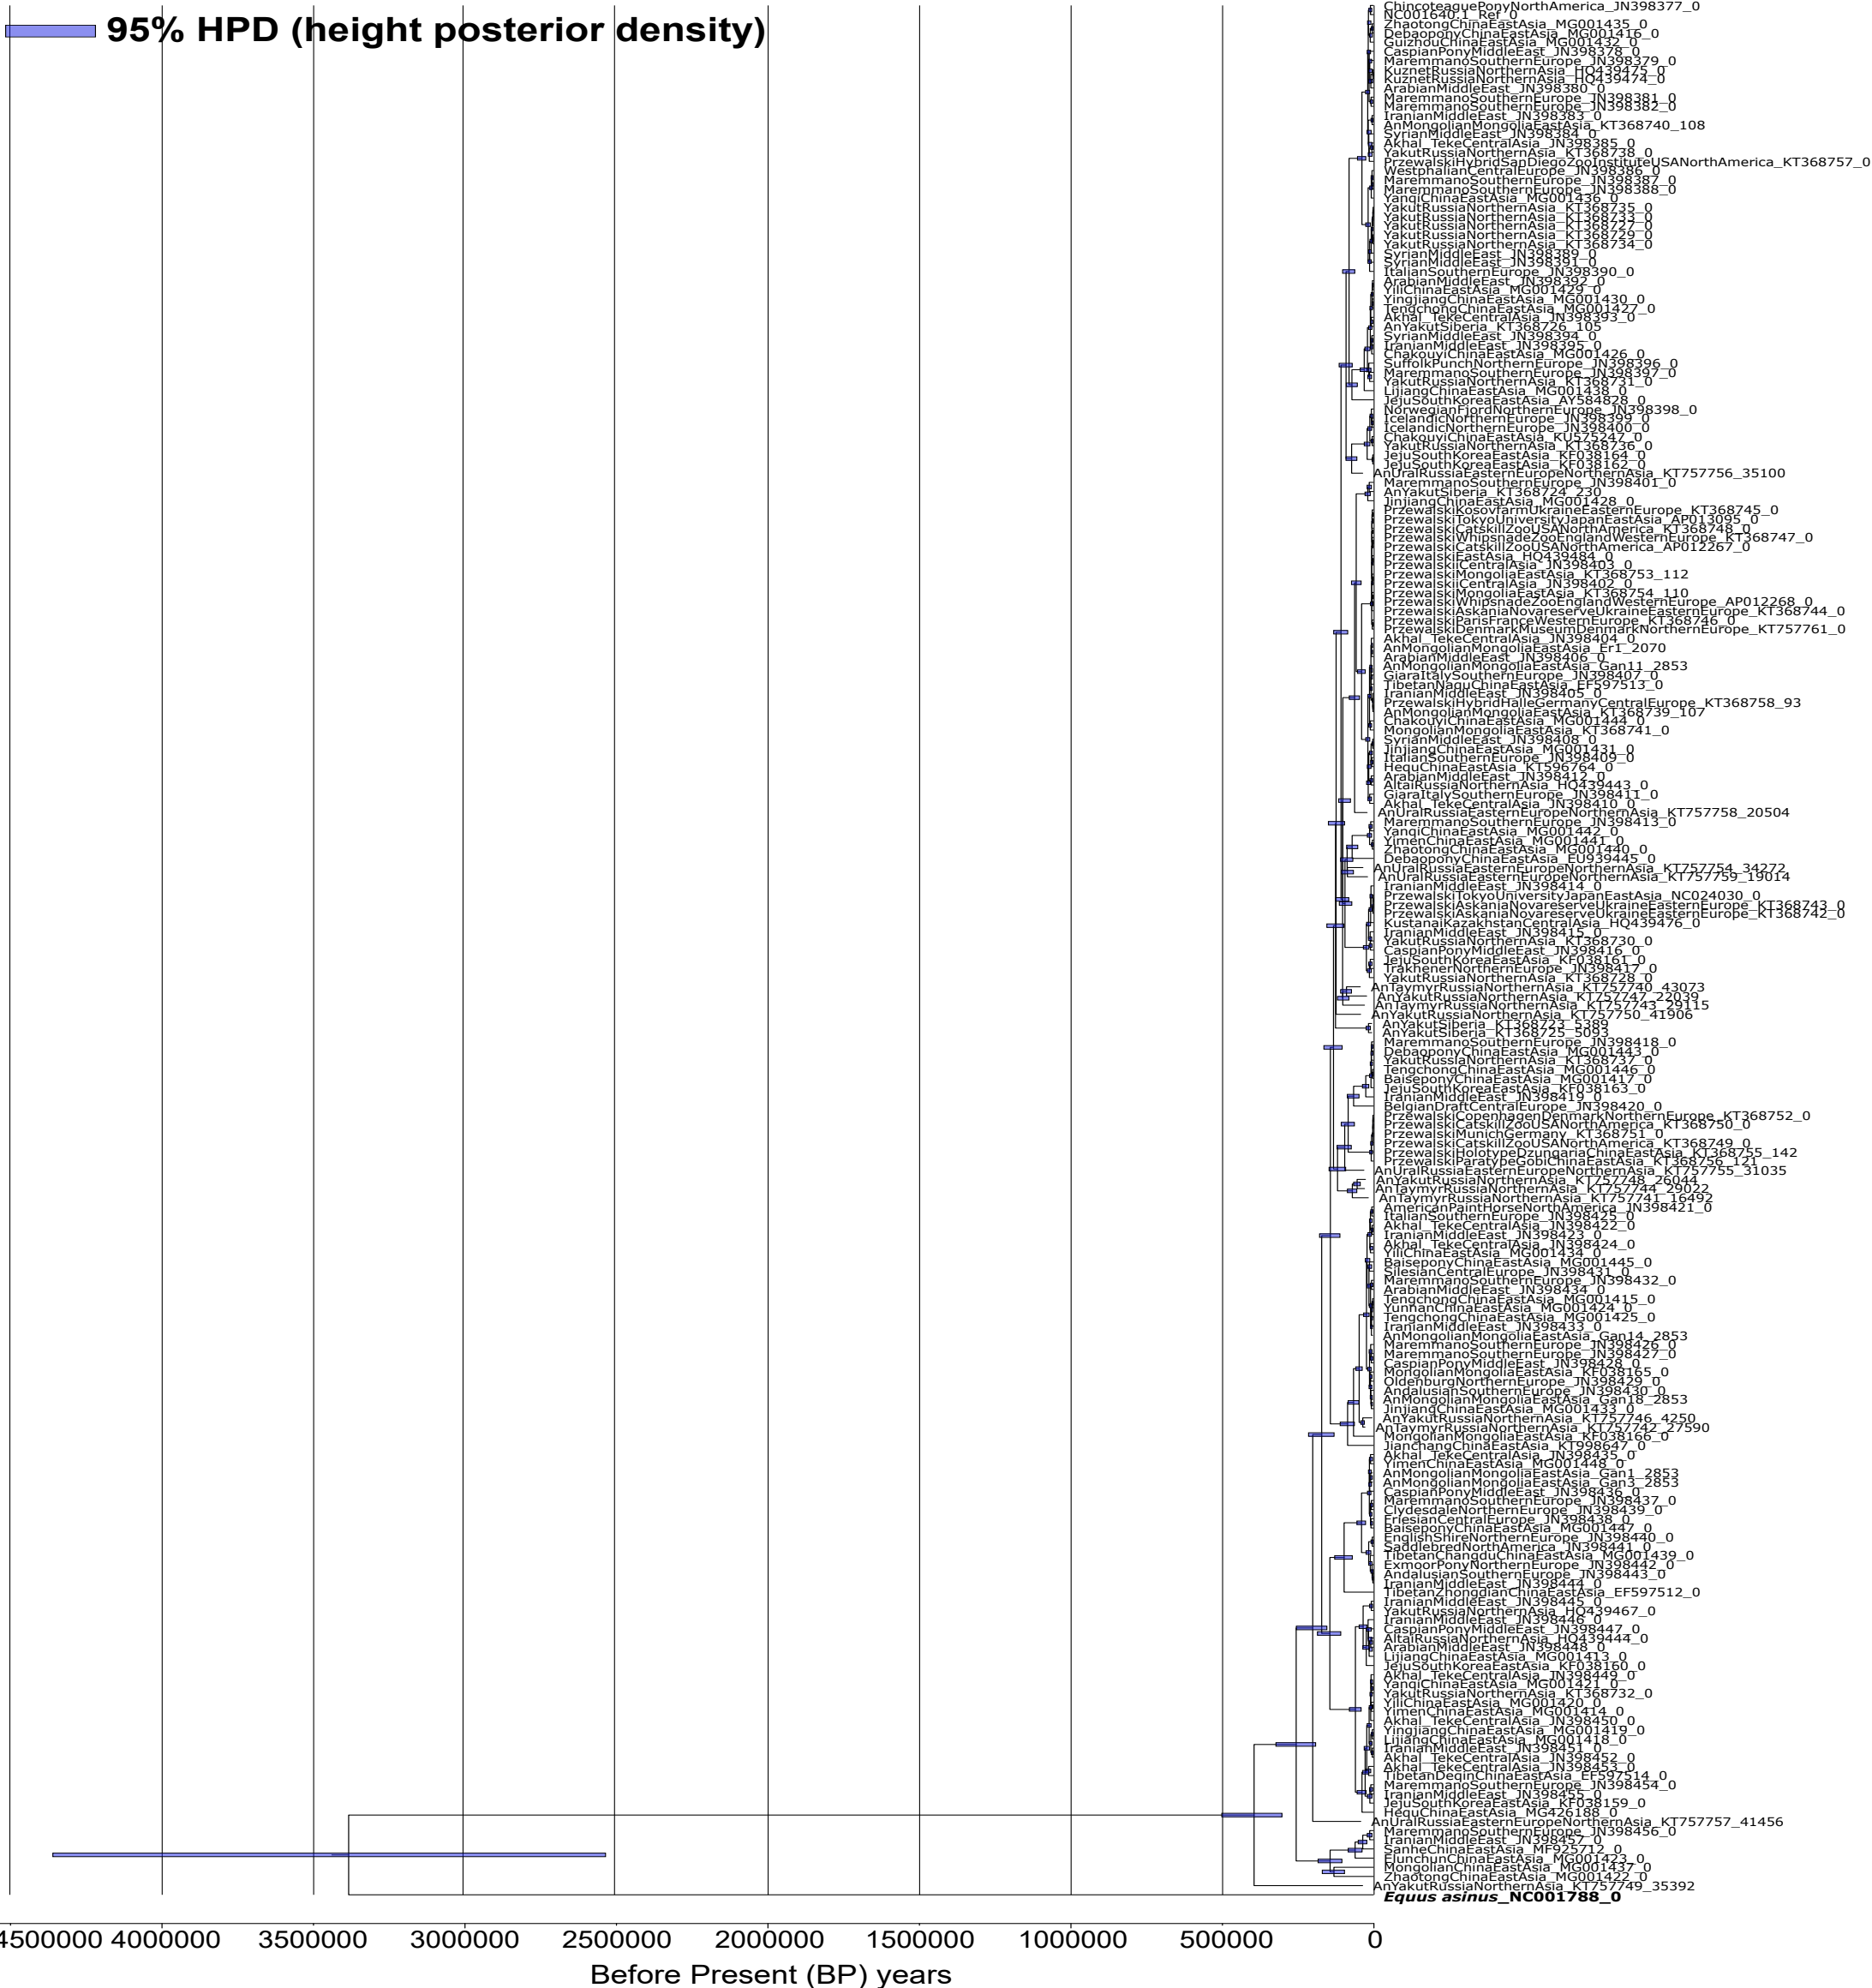

Supplement: s1 [file s1]
